# Supplementary material for: Microestimates of wealth for all low- and middle-income countries
Source: PubMed Central journal article supplement — Proc Natl Acad Sci U S A. 2022 Jan 11;119(3):e2113658119. doi: 10.1073/pnas.2113658119 (PMC8784134; doi:10.1073/pnas.2113658119), 2022-01-11
Supplement: pnas.2113658119.sapp.pdf [file pnas.2113658119.sapp.pdf]

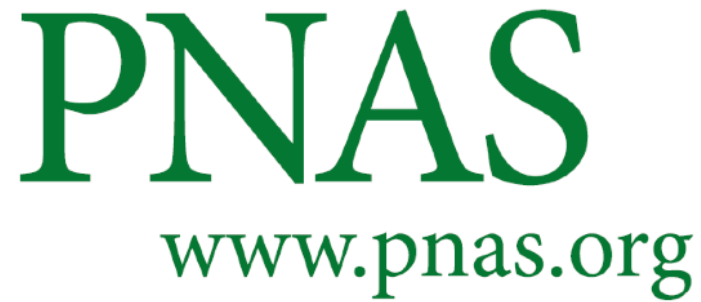

## **Supplementary Information for**

### **Micro-Estimates of Wealth for all Low- and Middle-Income Countries**

**Guanghua Chi, Han Fang, Sourav Chatterjee, Joshua E. Blumenstock**

**Joshua E. Blumenstock**

**E-mail: [jblumenstock@berkeley.edu](mailto:jblumenstock@berkeley.edu)**

#### **This PDF file includes:**

Figs. S1 to S19

Tables S1 to S6

SI References

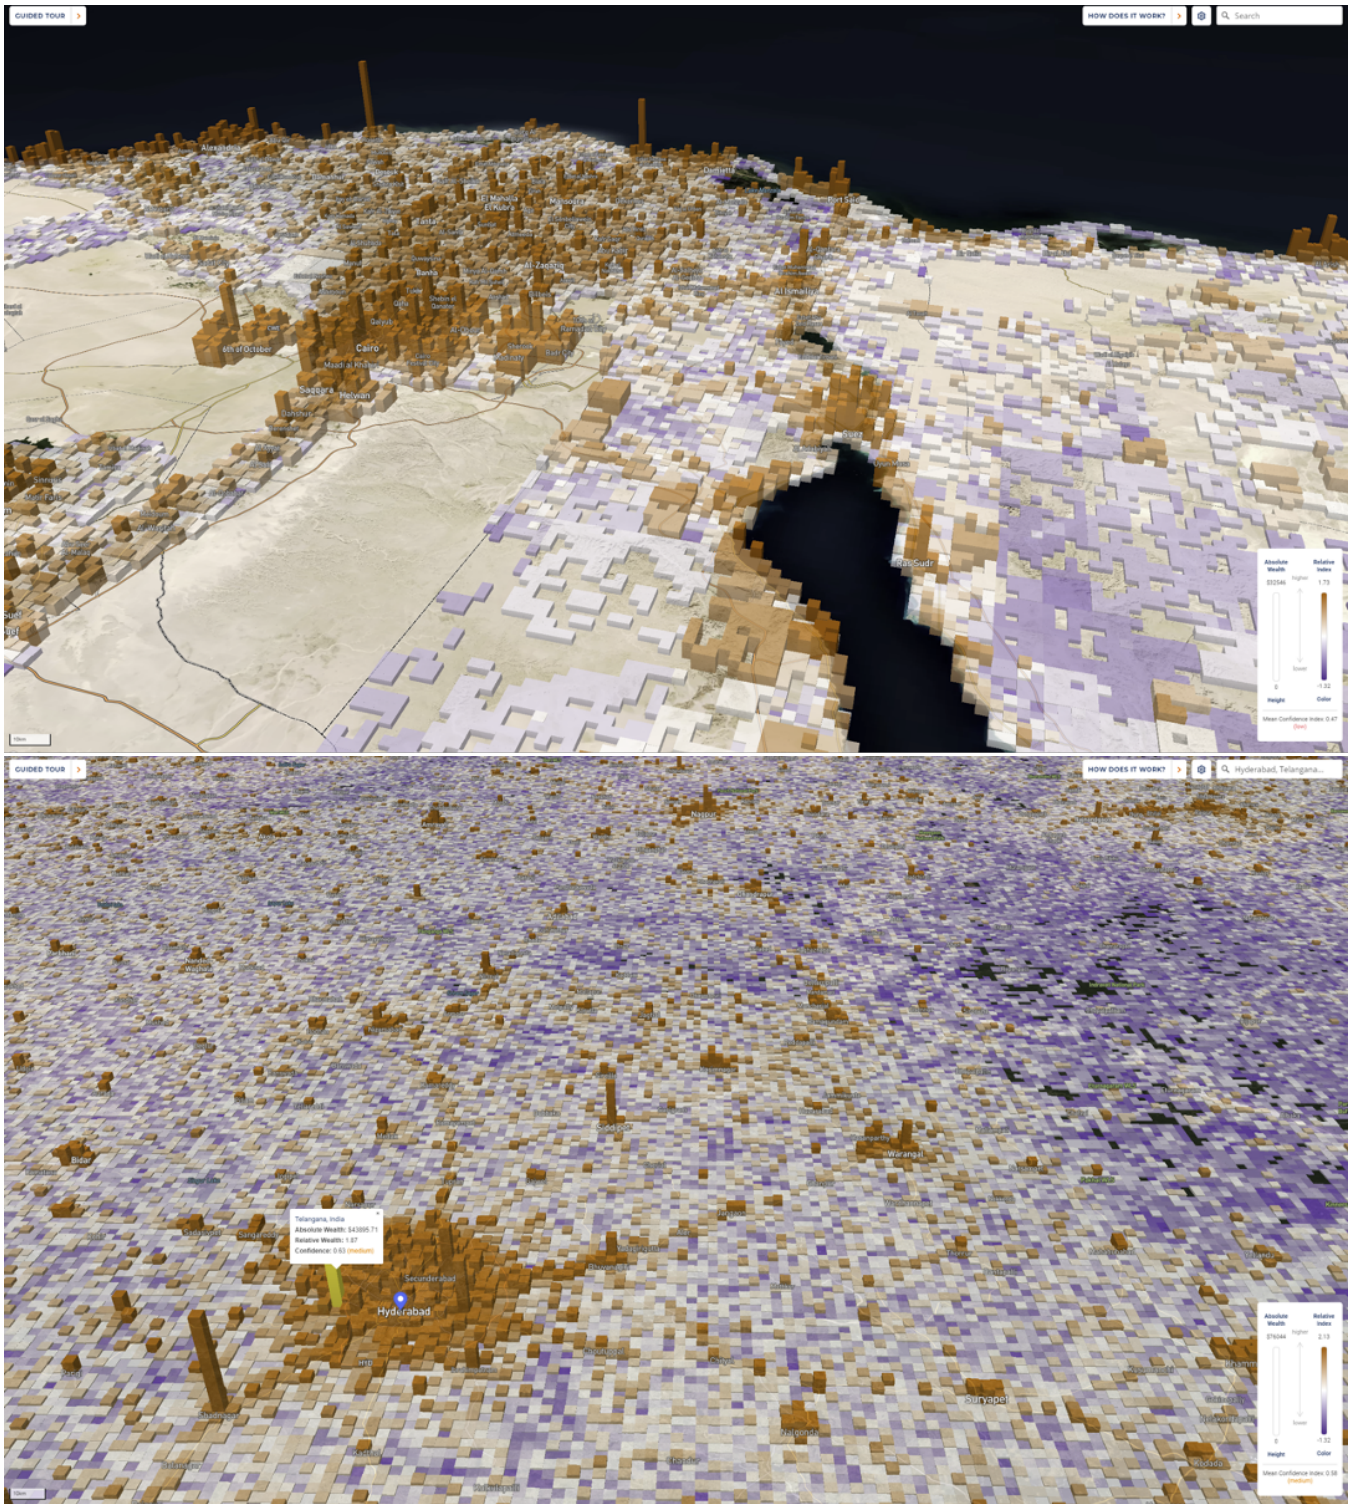

**Fig. S1.** Screenshots of the interactive data visualization. Each grid cell corresponds to a 2.4km grid cell. Absolute wealth (in dollars) indicated by the height of the grid cell. Relative wealth (relative to other cells in that country) indicated by colors ranging from blue (poorest) to red (wealthiest). a) Region around the Suez canal. b) Region around Hyderabad, India.

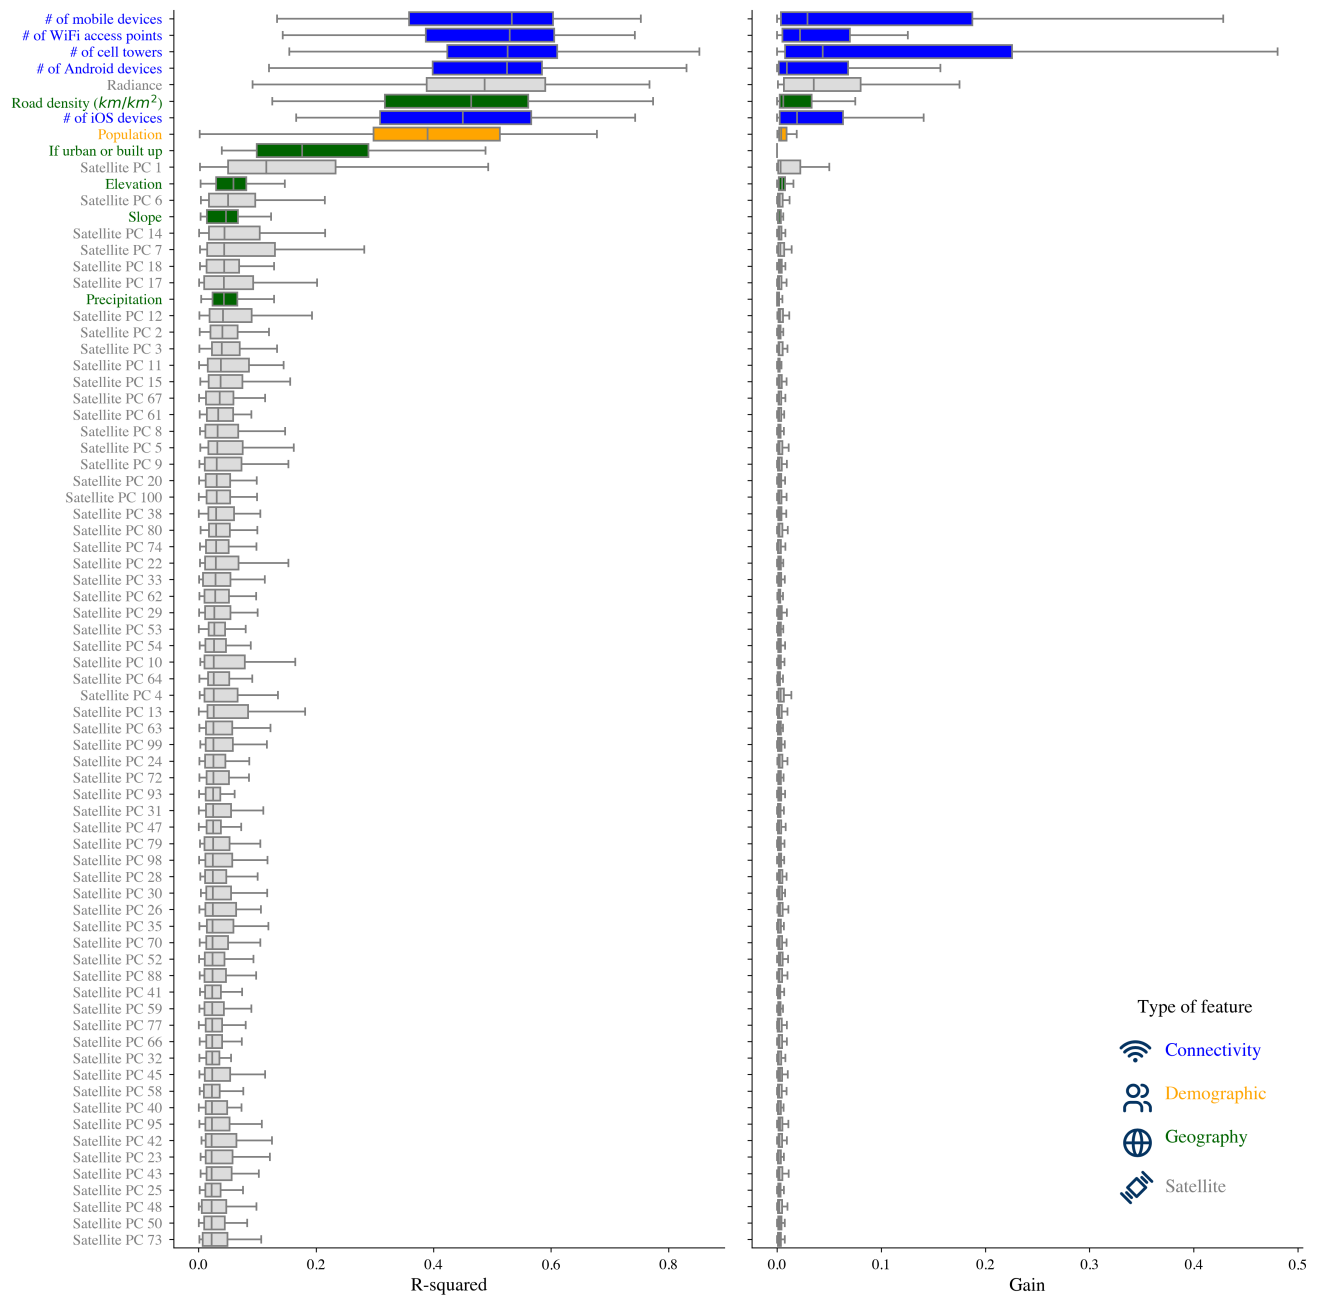

**Fig. S2.** Which input data are most useful? Two different measures of the importance of each input variable in predicting sub-regional wealth. We show the distribution of feature importances for each feature as a boxplot, where the distribution is obtained from training 56 country-specific models with 5-fold cross-validation. a) The  $R^2$  value from a univariate regression of wealth on each feature. b) Gain measures the total contribution of each feature to the final fitted model. Details on each variable are provided in Table S2. Box plots indicate median (center line), interquartile range (shaded box), and 1.5x interquartile range (whiskers).

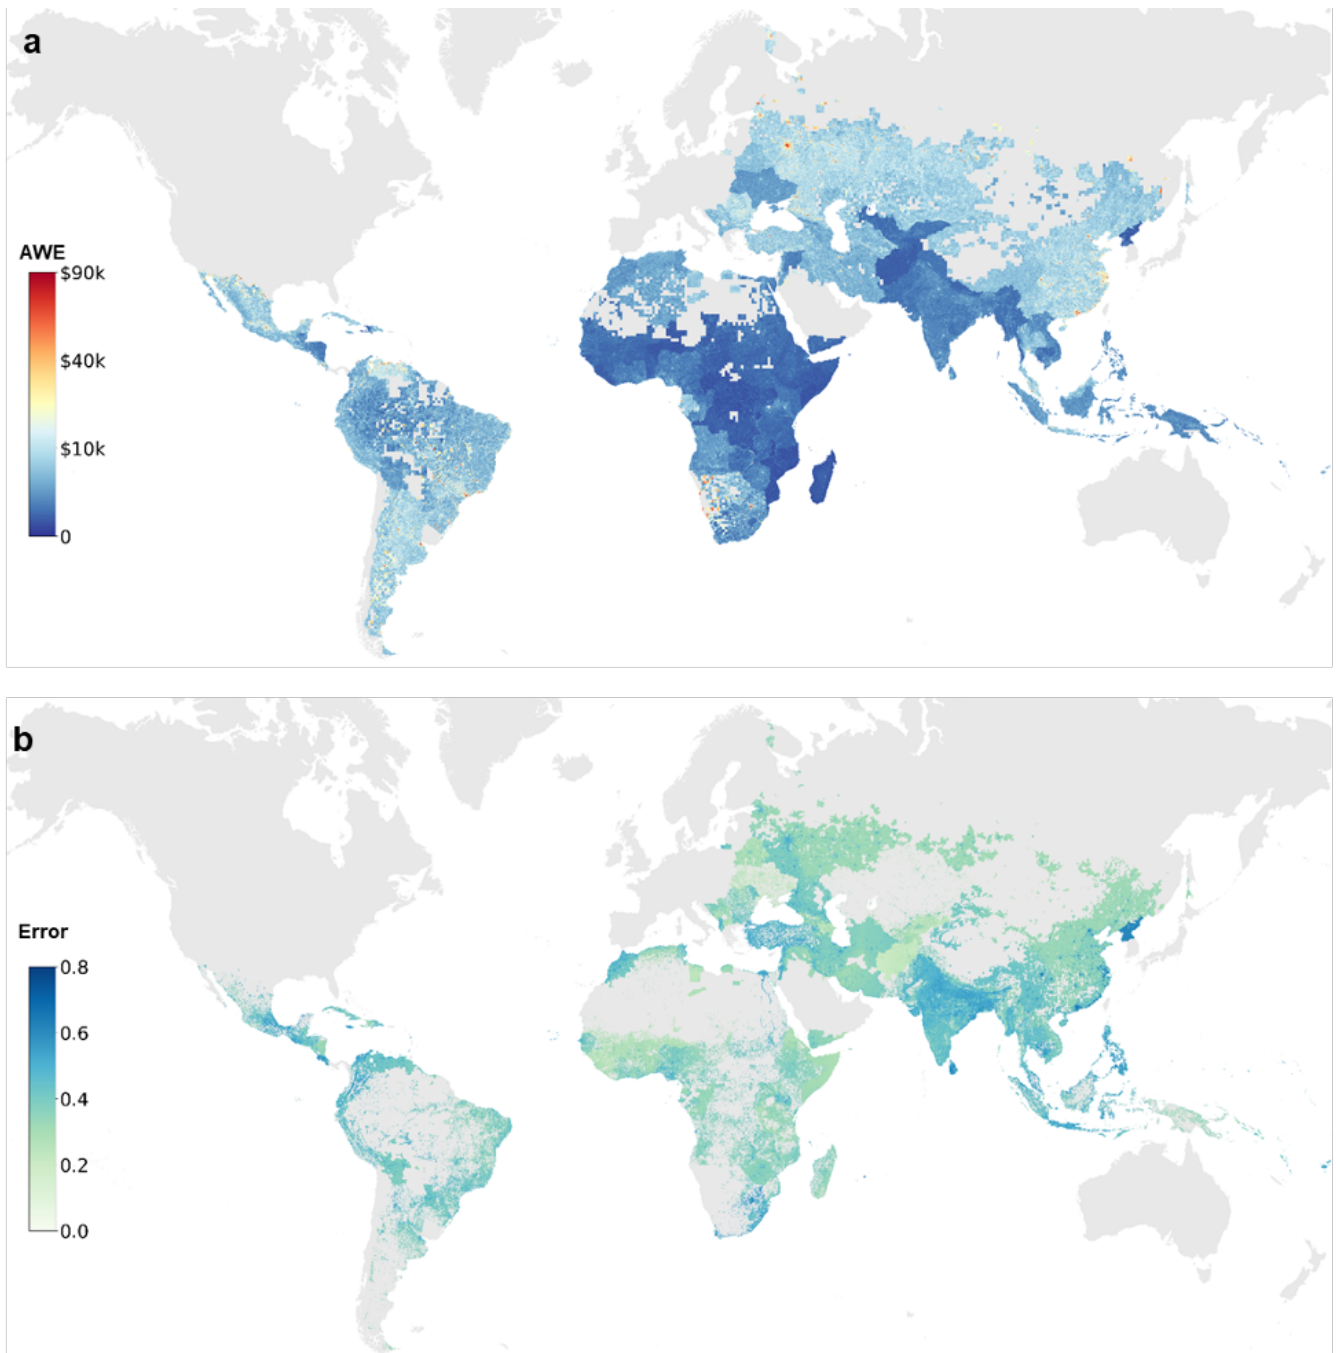

**Fig. S3.** Estimates of absolute wealth and of model error. a) Absolute wealth estimates (AWE), which indicate the estimate of the average GDP per capita of households in each grid cell. RWI estimates are converted to AWE estimates using information about the income distribution of each country. b) Predicted absolute error of each grid cell, obtained by regressing the absolute residual of the wealth prediction model (i.e., the model that generates the estimates in Fig. 1) on a vector of observable characteristics of each grid cell.

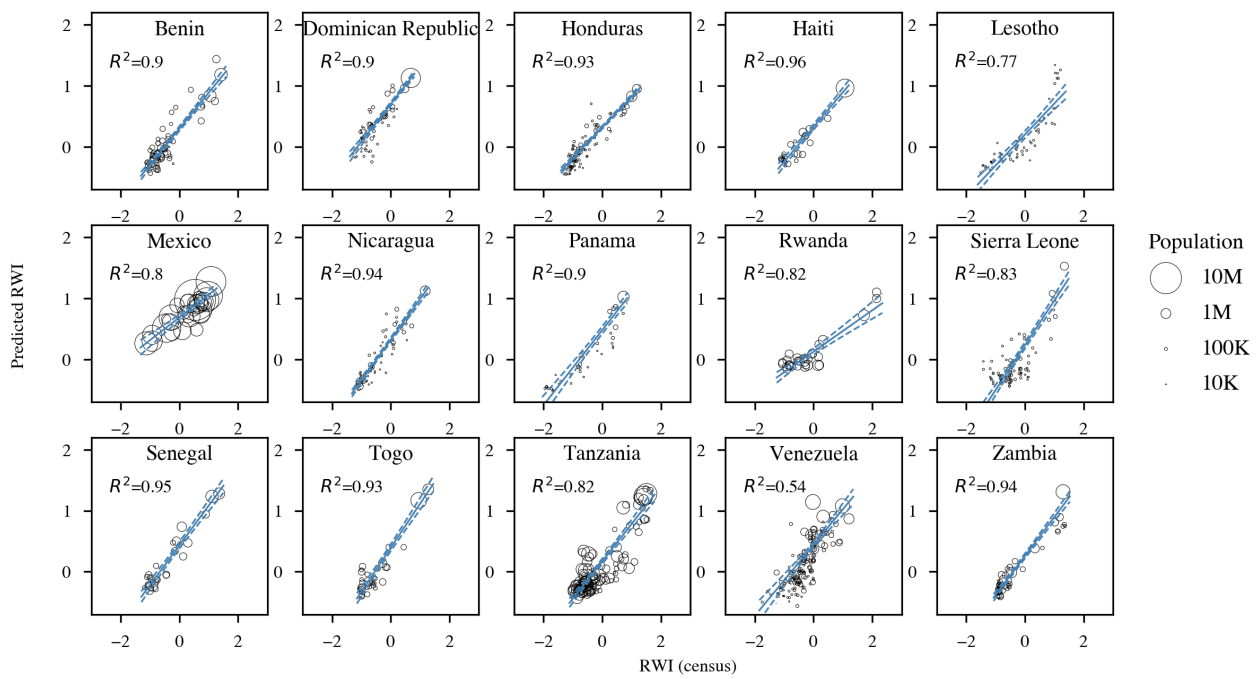

**Fig. S4.** Model validation using census data in low- and middle-income countries. For each of 15 countries with publicly available census data, we compare the average RWI of each second-level administrative region, as predicted by the ML model, to the average wealth captured in the census (see Methods). Each dot represents an administrative region, sized by population. Blue line indicates population-weighted regression line, with 95% confidence intervals as dashes. Average  $R^2$  across all models is 0.86.

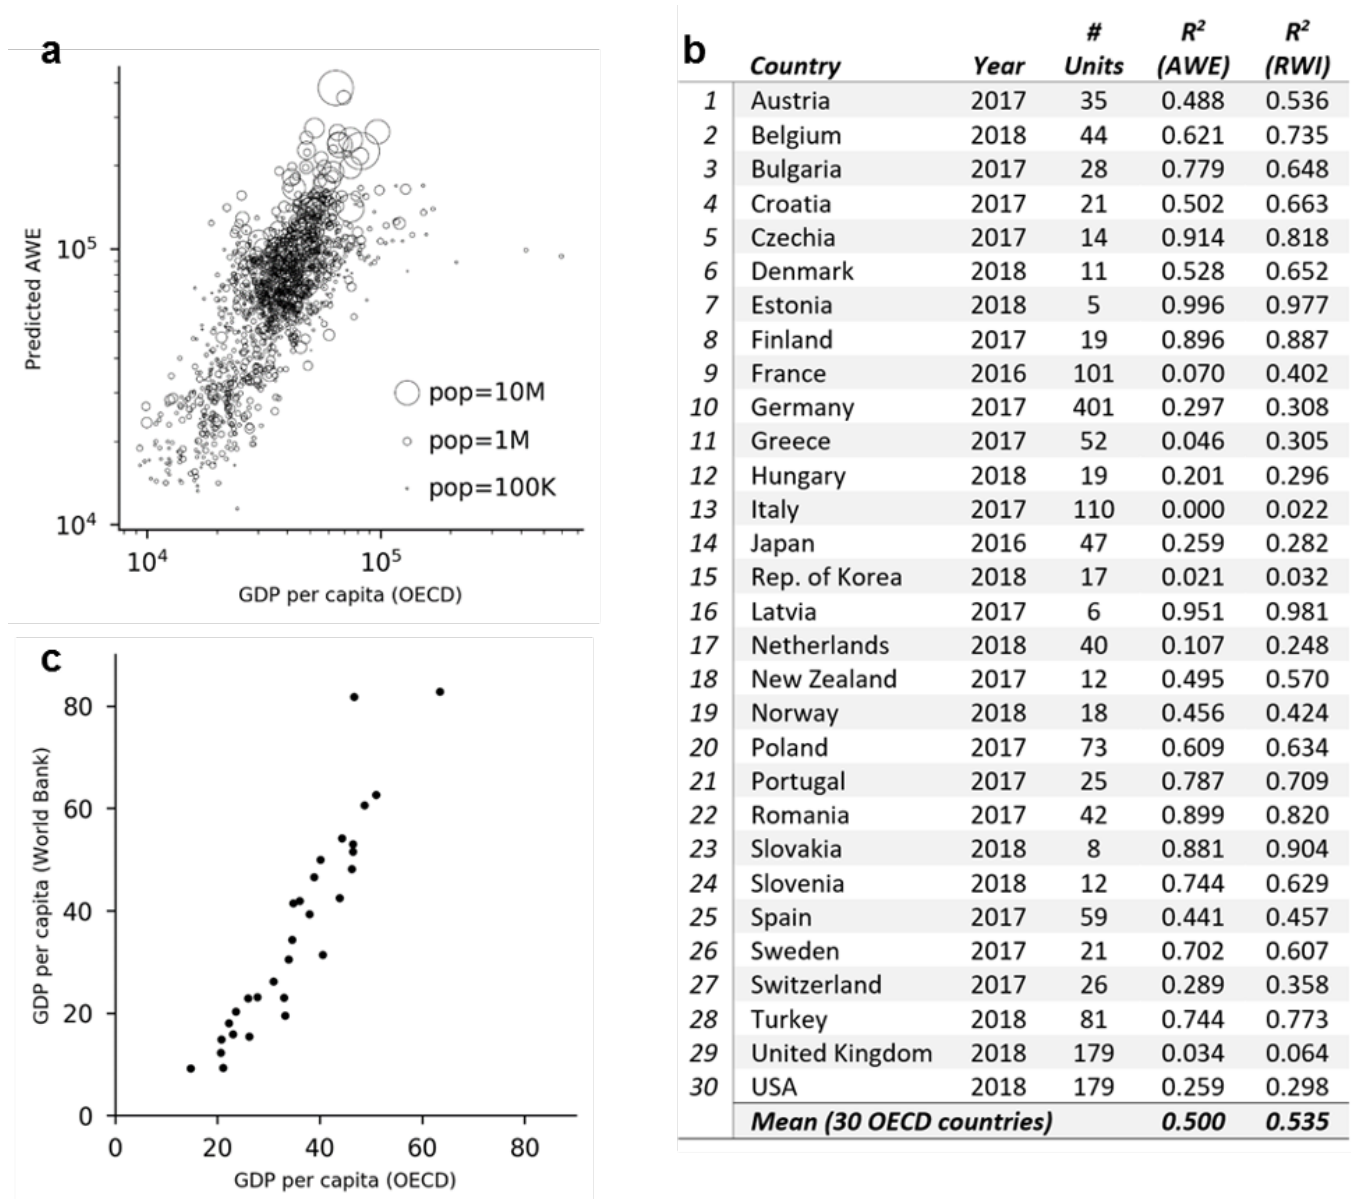

**Fig. S5.** Model validation in high-income nations. Figures compare the model's estimates of wealth to data provided by the OECD for 30 member countries. a) The 30 nations contain 1540 unique second-level administrative regions, each of which is represented by a dot that is sized proportional to the population of the region. Figure shows the OECD's estimate of per capita GDP for the region (x-axis) vs. the Absolute Wealth Estimates (AWE) of the region generated by the ML model. Population-weighted regression line  $R^2 = 0.59$ . b) We separately calculate, for each of the 30 OECD countries with available GDP data, the  $R^2$  that results from regressing predicted AWE on GDPpc, across all admin-2 regions within each country. c) The estimate of a country's GDPpc from the World Bank, which forms the basis for the AWE estimates, is generally larger than the average regional GDPpc as reported in the OECD data. Values on axes represent thousands of US Dollars.

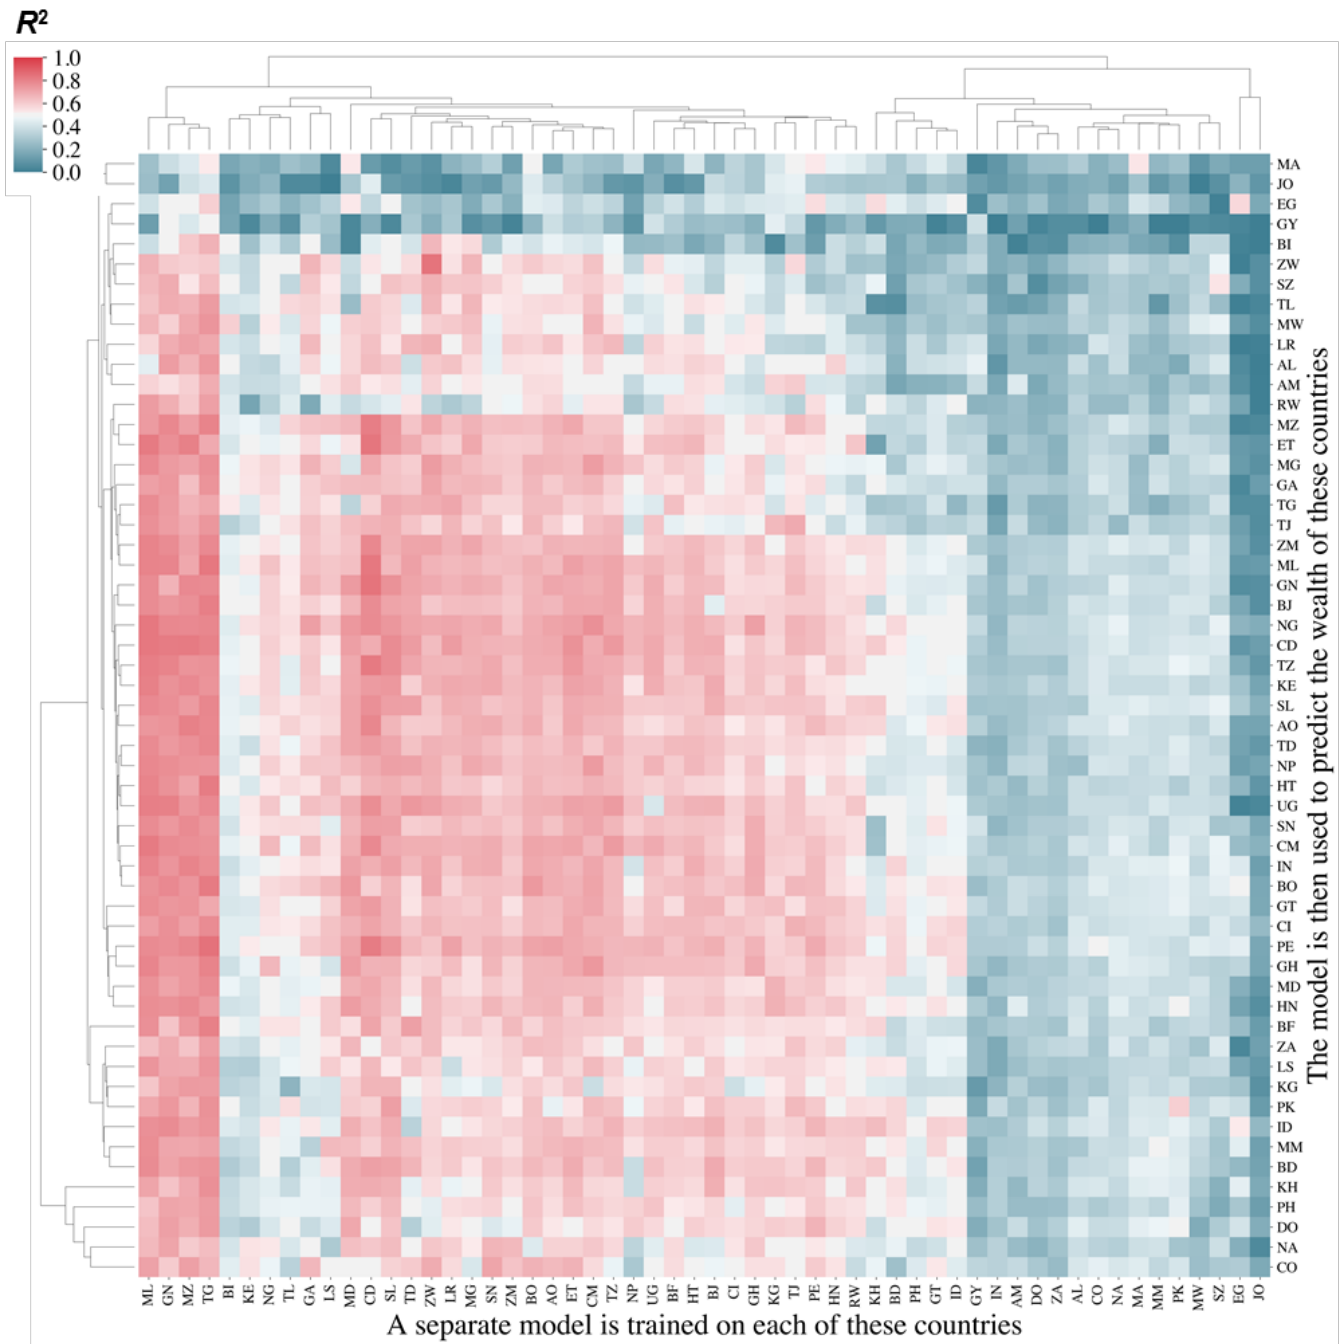

**Fig. S6.** Geographic generalizability of wealth predictions. For each of the 56 countries with ground truth wealth data, a separate model is trained using data from just that country (the columns in the above matrix). Those models are then tested on previously unseen data from each of the countries (the rows in the matrix). Colors indicate the  $R^2$  between the model's predictions and ground truth. Models generally perform better on nearby and similar countries. Rows and columns are ordered using a hierarchical clustering algorithm (UPGMA).

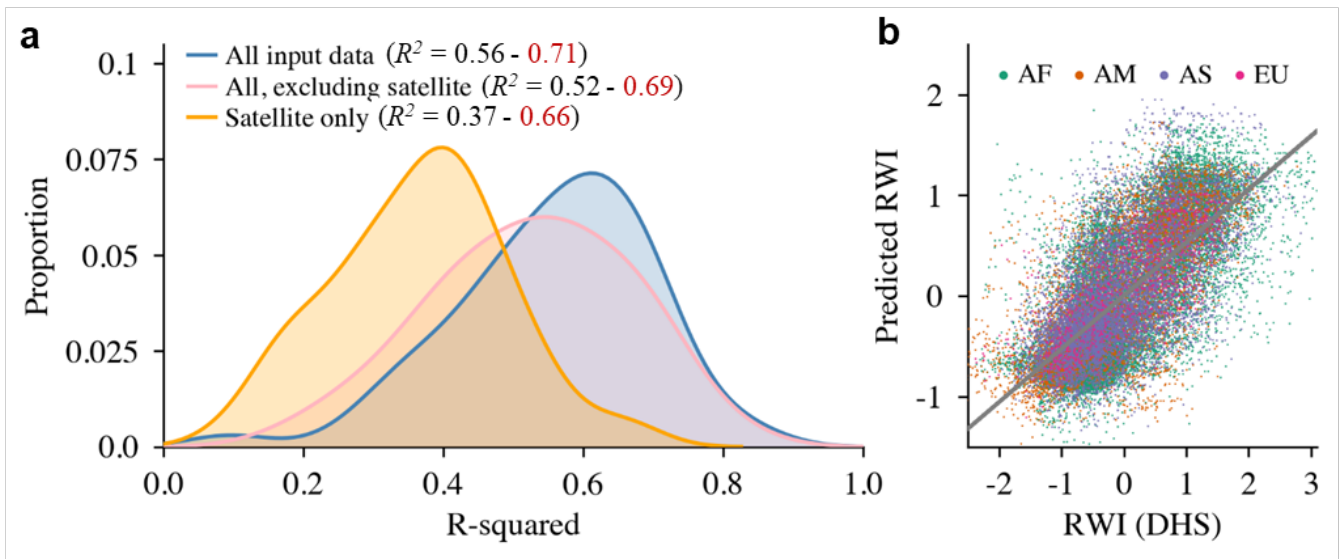

**Fig. S7.** Models trained only on satellite data do not perform as well as models that include other input data. a) The distribution of performance across the 56 LMIC's, measured using spatially-stratified cross-validation, is shown as three kernel density plots, one for each subset of input data. The legend reports the average performance ( $R^2$ ) in black, and the average performance using standard cross-validation in red (to facilitate comparison to prior work). b) Scatter-plot shows relationship between the actual wealth index (from survey data) and the predicted wealth index (output by the model), using all 66,819 labeled survey locations on four continents (AF=Africa, AM=Americas, AS=Asia, EU=Europe).



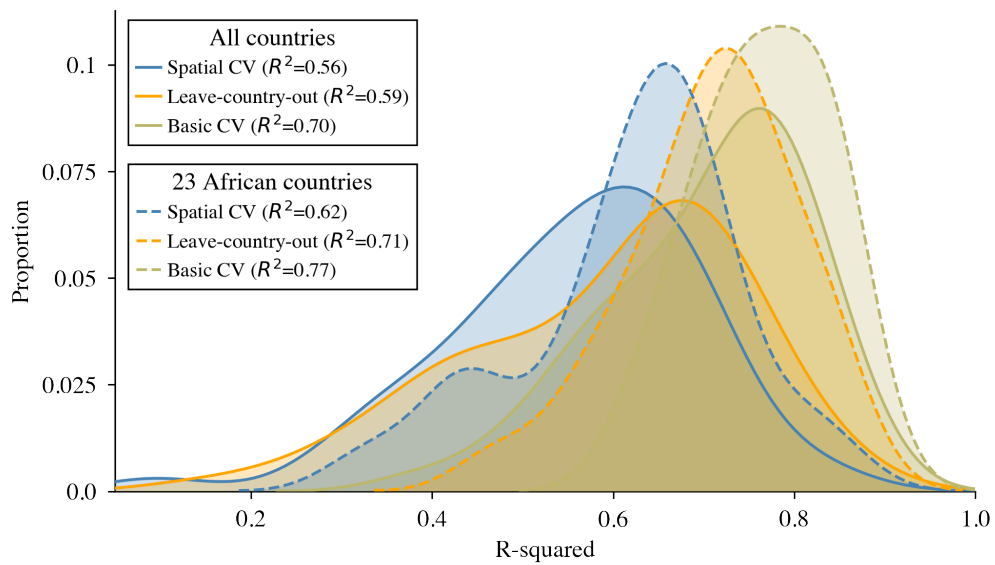

**Fig. S8.** Predictive performance is higher when evaluated on a more homogeneous set of African nations. Solid lines show the distribution of model performance, across 56 countries with ground truth data, using 3 different approaches to cross-validation – these results are identical to Fig. 3a. Dashed lines show the distribution of model performance, evaluated across the 23 African countries studied by Yeh et al (2020).

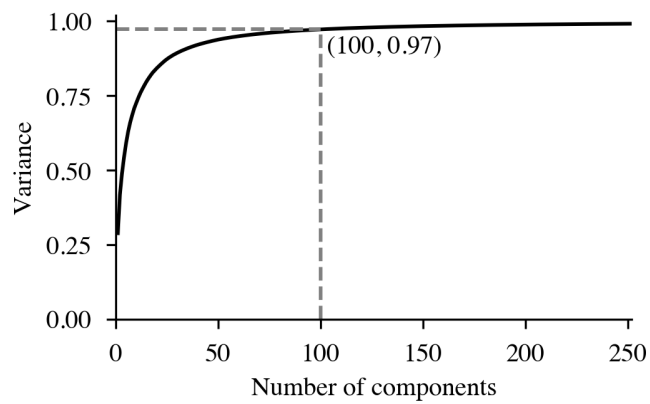

**Fig. S9.** Feature engineering from satellite imagery. To reduce the dimensionality of the raw satellite imagery, we first use a neural network to extract 2048 features from the data (see Methods), and then apply principal component analysis (PCA) to the set of 2048 features. Figure shows the cumulative proportion of variance explained by the first  $k$  principal components. Our final model uses 100 components, which cumulatively explain 97% of the total variance of the 2048-dimensional image features.

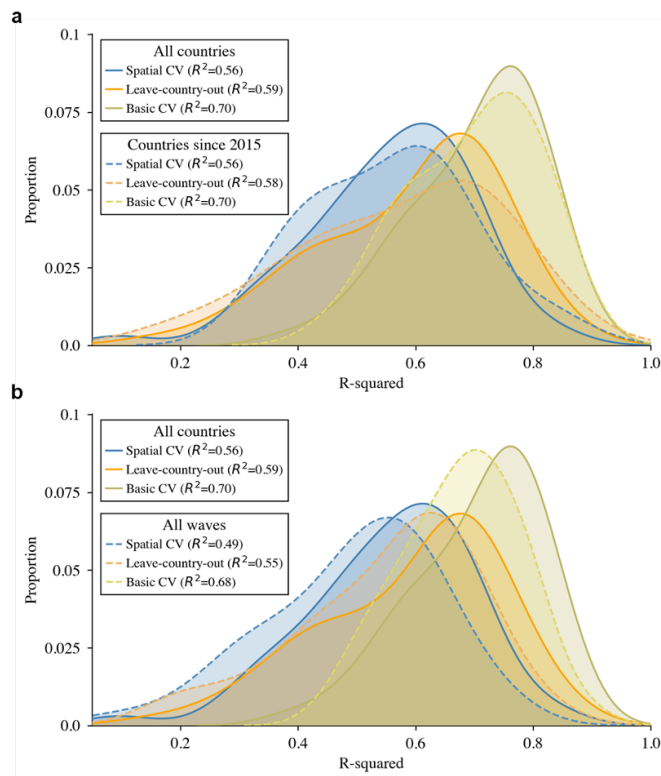

**Fig. S10.** Model performance when trained using surveys from different periods in time. a) Performance using recent data only. The solid lines (labeled “All countries”) reproduce the analysis of Fig. 3a, and show the distribution of model performance for a model trained on 56 countries with DHS data, using 3 different approaches to model cross-validation. The dashed lines indicate the performance for a model that is trained on the subset of 24 countries where DHS data was collected in 2015 or later. b) Performance using all available survey waves. Several countries have conducted multiple DHS surveys since 2000. The figure compares the main model’s performance (using 56 survey-waves from 56 countries) to the performance of a model trained and evaluated on all available DHS data (117 survey-waves from 56 countries).

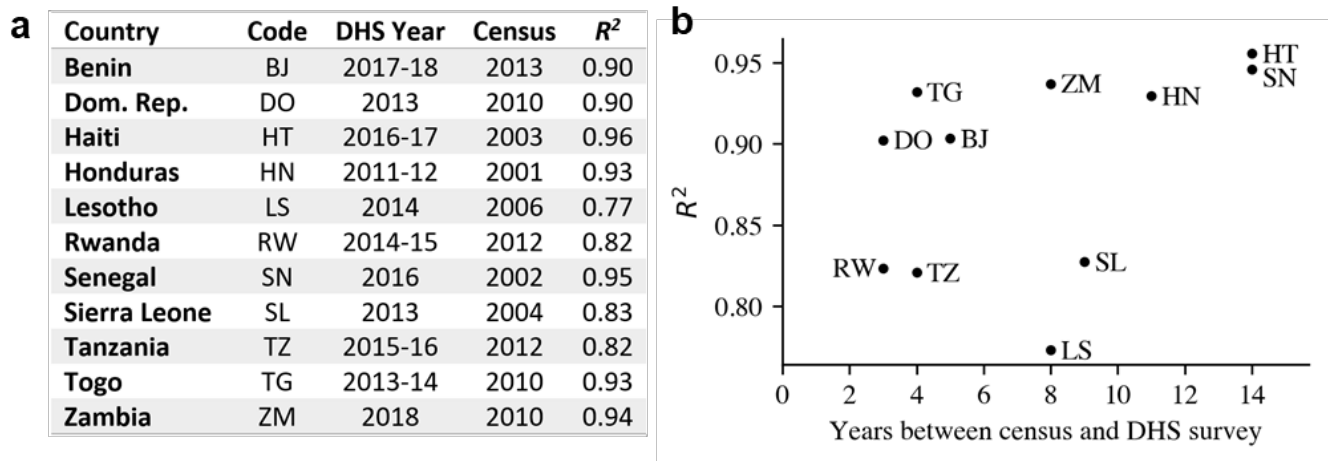

**Fig. S11.** Validation accuracy for 11 countries with DHS and census data. a) Of the 56 countries used to train the model, 11 have publicly available census data with asset information. The table indicates the dates of the most recent DHS survey and census in each country, as well as the correspondence ( $R^2$ ) between the model predictions and the census data (see also Fig. S4). b) Figure illustrates that there is no clear relationship between the gap in years between the most recent DHS survey and census (x-axis) against the validation accuracy of the model, for each of these 11 countries.

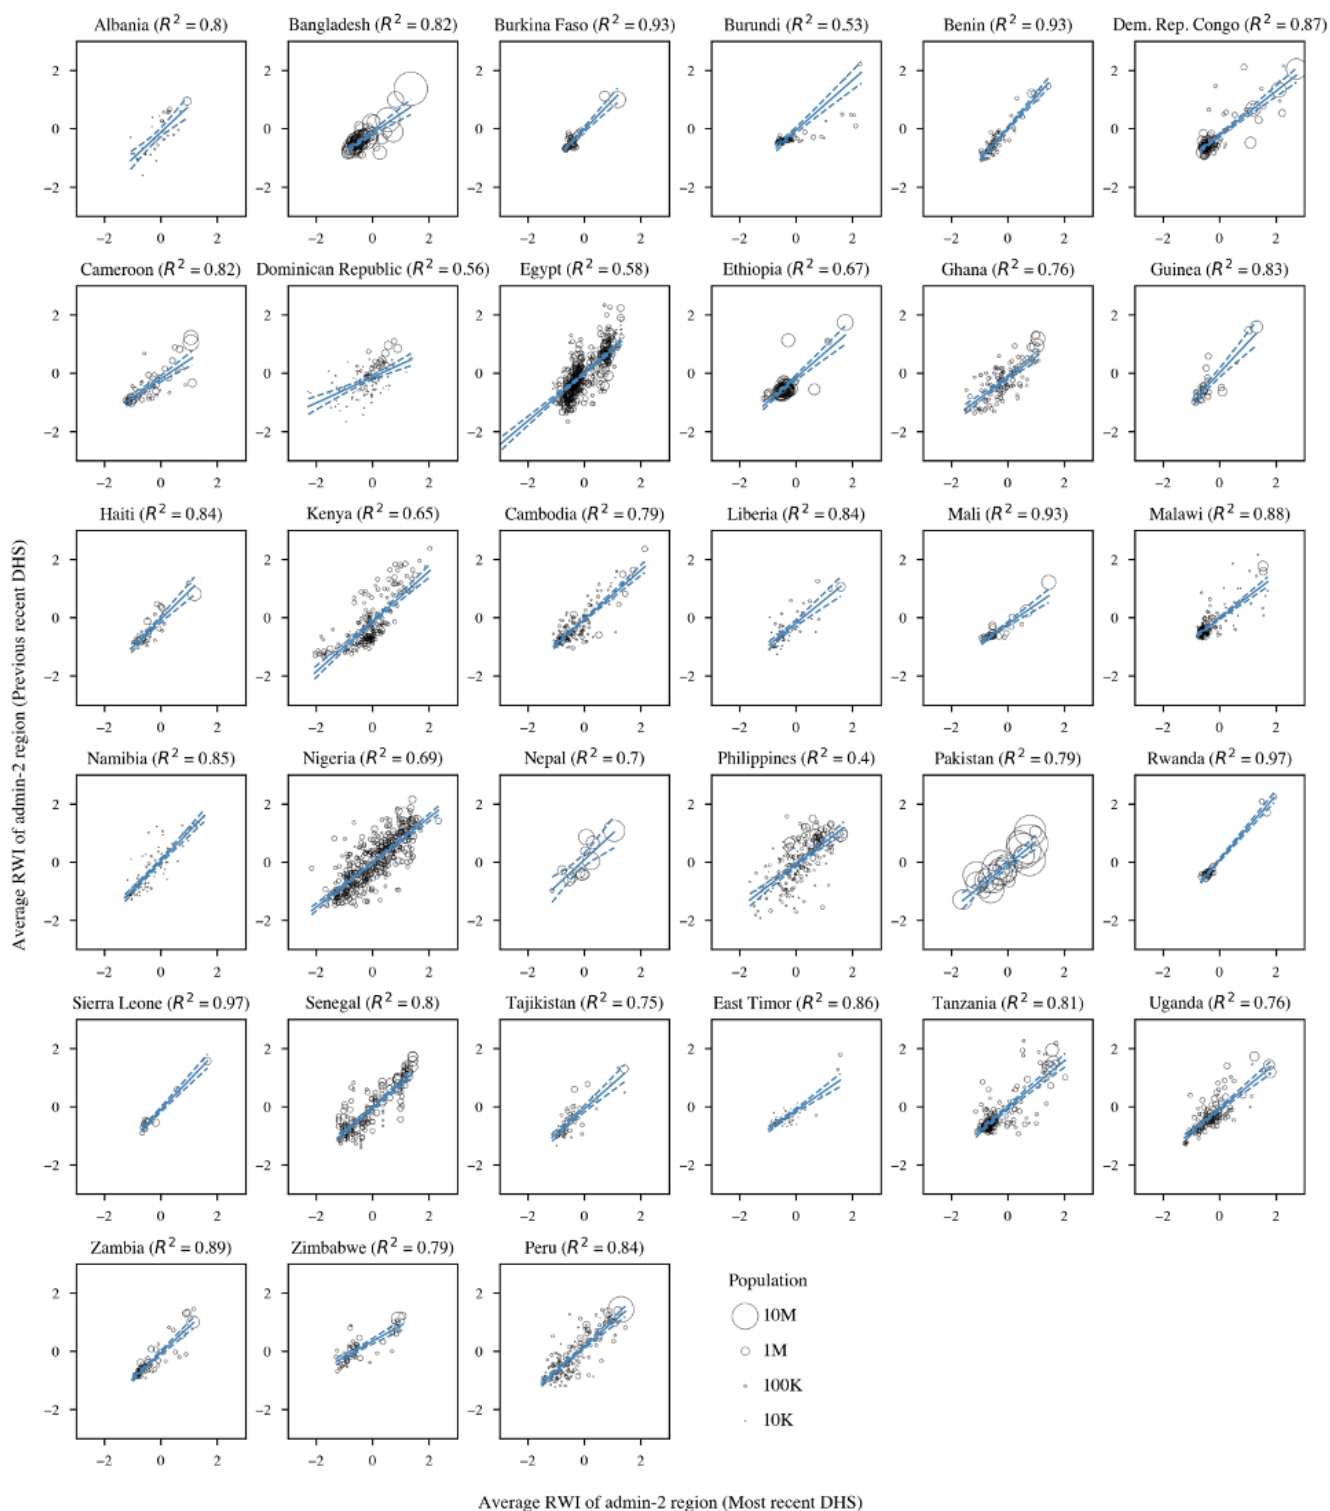

**Fig. S12.** Temporal stability of within-country wealth over time. For each country with two or more DHS since 2000, each subfigure plots the relationship between the average RWI of each 2nd-level administrative unit as computed from the most recent DHS (x-axis) against the average RWI of the same unit as computed from the previous DHS. Each circle represents an administrative region. Blue line indicates population-weighted regression line, with 95% confidence intervals as dashes. Median (mean)  $R^2$  across all countries is 0.81 (0.78).

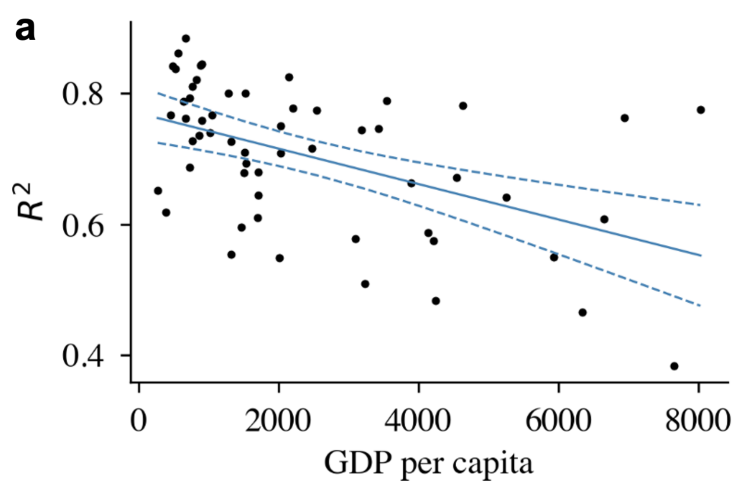

|                        | $\beta$    | SE    |
|------------------------|------------|-------|
| Low income             | -0.0228    | 0.041 |
| Upper middle income    | -0.2084*** | 0.052 |
| Gini                   | -0.3560    | 0.283 |
| ln(Country population) | -0.0021    | 0.013 |
| Is island              | -0.0336    | 0.057 |
| Is landlocked          | 0.0083     | 0.040 |
| Is Africa              | 0.0490     | 0.106 |
| Is Asia                | -0.0633    | 0.097 |
| Is America             | 0.1085     | 0.109 |
| Constant               | 0.7570***  | 0.230 |
| Observations           | 56         |       |
| $R^2$                  | 0.404      |       |

Note: Lower-middle income is omitted country category.  
 \*significant at 10 percent; \*\* 5 percent; \*\*\* 1 percent.

**Fig. S13.** Model performance and country characteristics. a) For each of the 56 countries with ground truth data from the DHS, the figure plots the country-level  $R^2$  (measured using basic 5-fold cross-validation) against that country's GDP per capita, as measured in Table S6. b) Coefficients and standard errors from a regression of the country-level  $R^2$  on country-level characteristics, for the 56 countries with ground truth data, indicates that model performance is slightly worse in upper middle-income countries (relative to the omitted category of lower-middle income countries, but is not significantly different in low-income countries or specific continents).

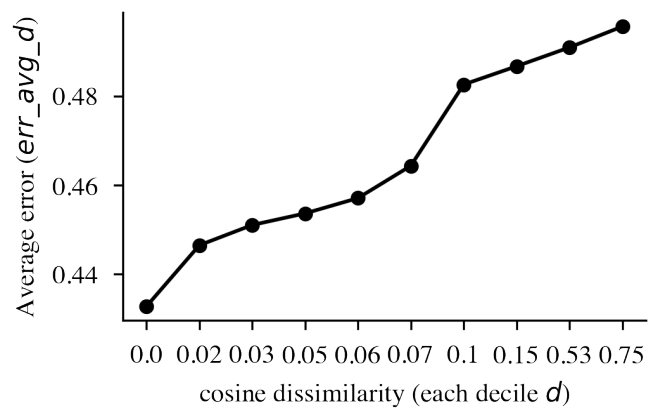

**Fig. S14.** Models perform better on countries with similar characteristics. X-axis shows the 10 deciles of the cosine dissimilarity distribution (i.e., one minus cosine similarity). Y-axis indicates the average prediction error across test countries, where a separate model for each test country is trained using data from countries at least  $d$  dissimilar to the test country.

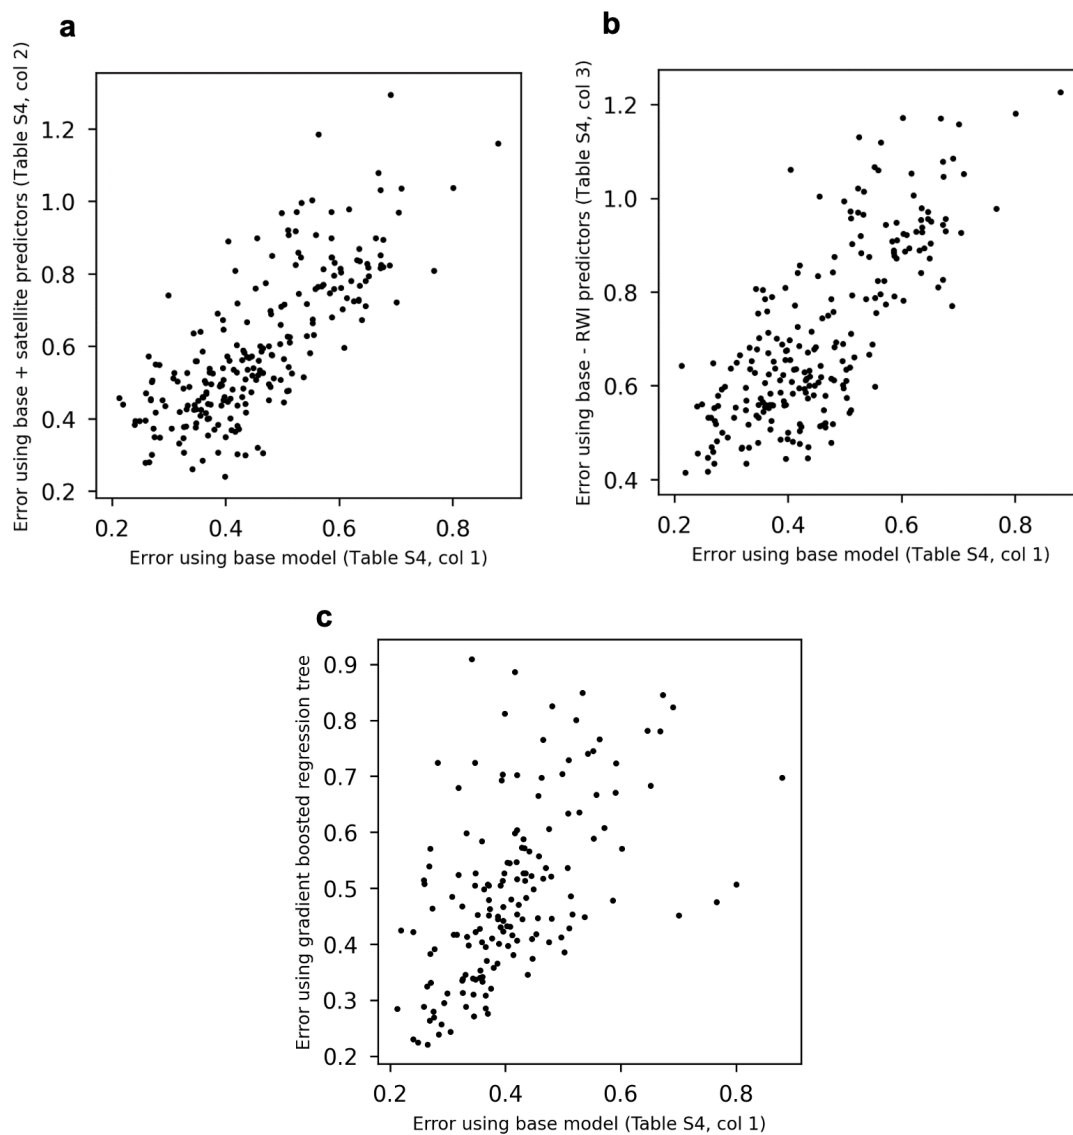

**Fig. S15.** Stability of error estimation to different model specifications. Figure compares the median error of all grid cells in a country from the base model (defined by column 1 of Table S4, and plotted on the x-axis of both figures) to three alternative model specifications (plotted on the y-axis). Each dot represents a country. a) Alternate model includes 100 satellite-based features (defined by column 2 of Table S4). b) Alternate model limited to only features not used to predict RWI (defined by column 3 of Table S4). c) Alternate model uses a gradient boosting algorithm to predict model error, using the same predictors as the base model.



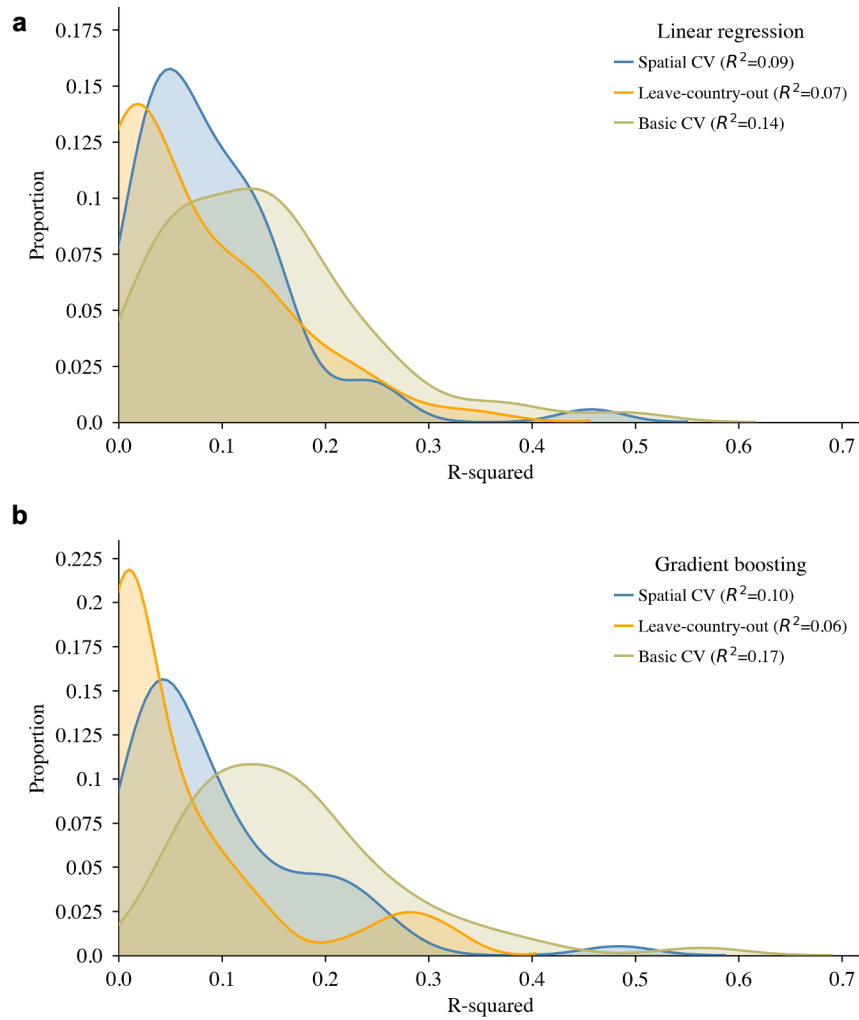

**Fig. S16.** Distribution of R-squared values from cross-validated predictions of absolute model error. Both figures present the distribution of model performance, across 56 countries with ground truth data, using 3 different approaches to cross-validation, where the target variables is the absolute value of the residual from the wealth prediction model, and the predictor variables are listed in Table S4. a)  $R^2$  values obtained from a linear regression model (as in Table S4). b)  $R^2$  values obtained from a gradient boosted regression tree (as in Fig S17).

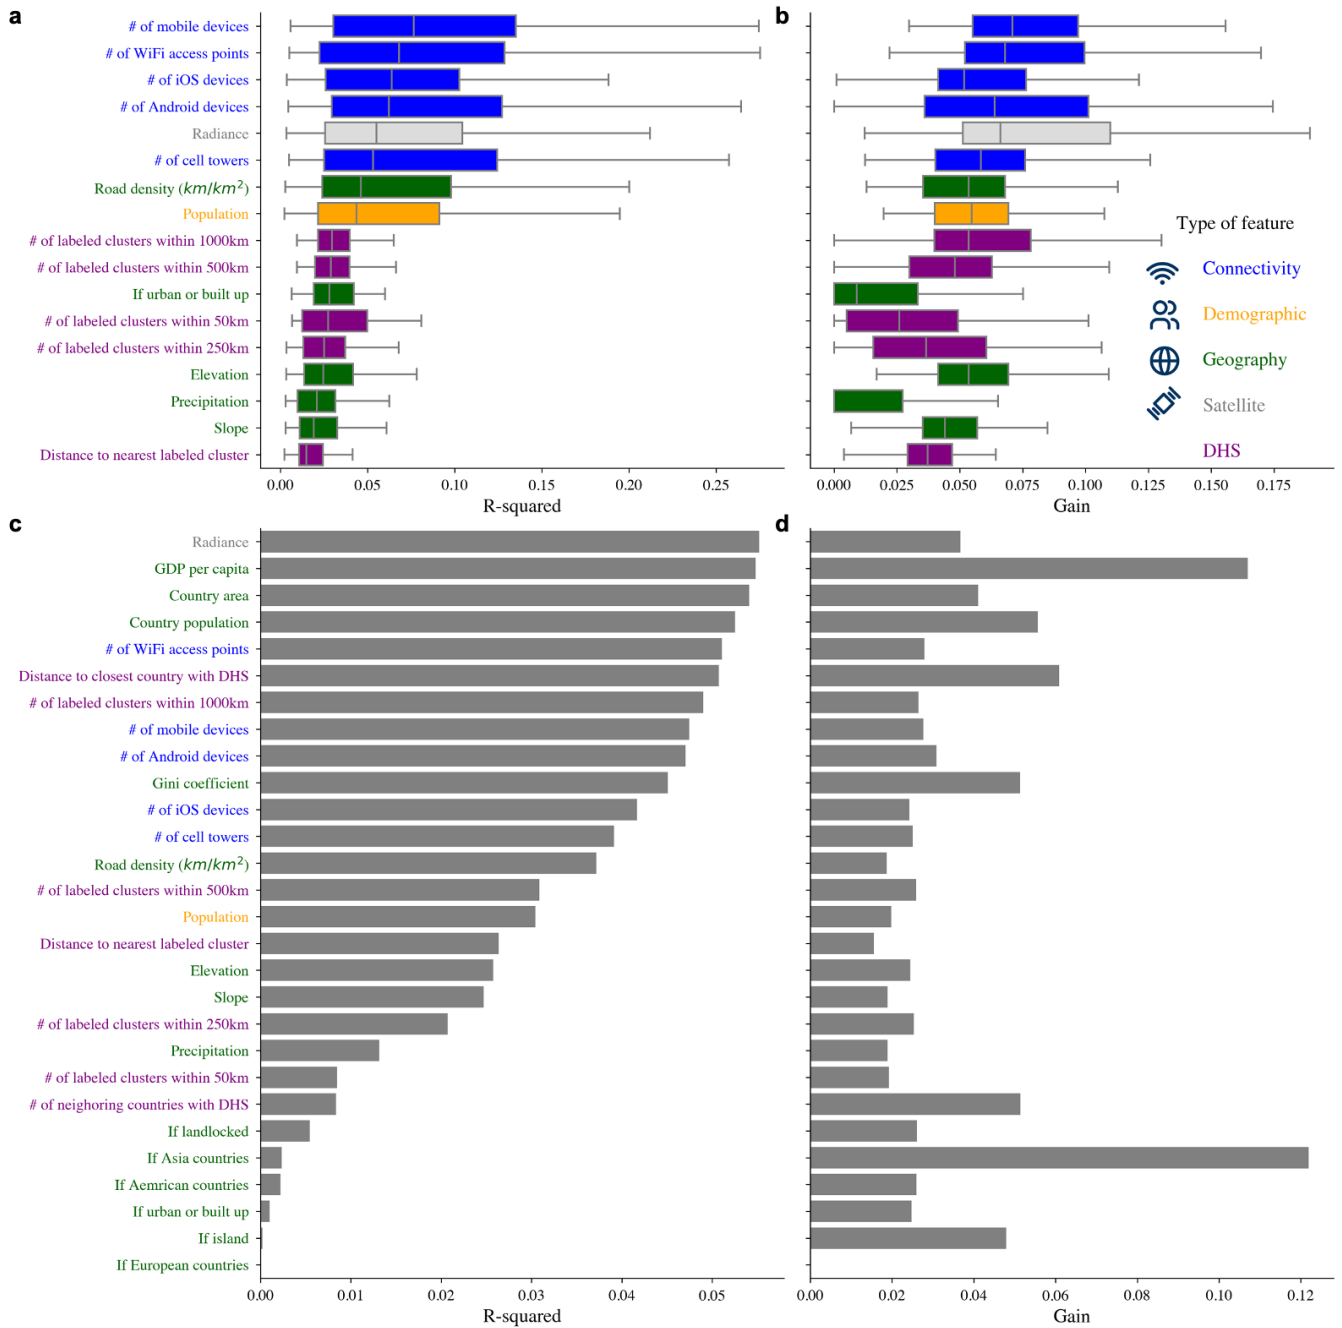

**Fig. S17.** Feature importances of gradient boosting algorithm used to predict model error. Top panels indicate the distribution of feature importances in predicting model error, where the distribution is obtained from training 56 country-specific models with 5-fold cross-validation. Bottom panels indicate the value of feature importance when a single model is trained on all of the labeled data from all countries. (i.e., all of the absolute residuals of the wealth prediction model from all locations with DHS data). a) and c) indicate the  $R^2$  value from a univariate regression of wealth on each feature. b) and d) indicate Gain, the total contribution of each feature to the final fitted model. Details on each variable are provided in Table S2. Box plots indicate median (center line), interquartile range (shaded box), and 1.5x interquartile range (whiskers).

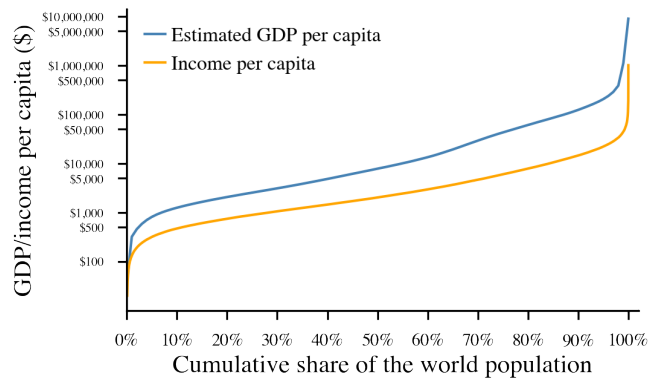

**Fig. S18.** The global income and estimated wealth distribution. Orange line shows the global income distribution in 2013, based on household income surveys for more than a hundred countries. Blue line shows the distribution of predicted "absolute wealth", a measure of per capita GDP, which is derived from the Relative Wealth Index that is the focus of this paper.

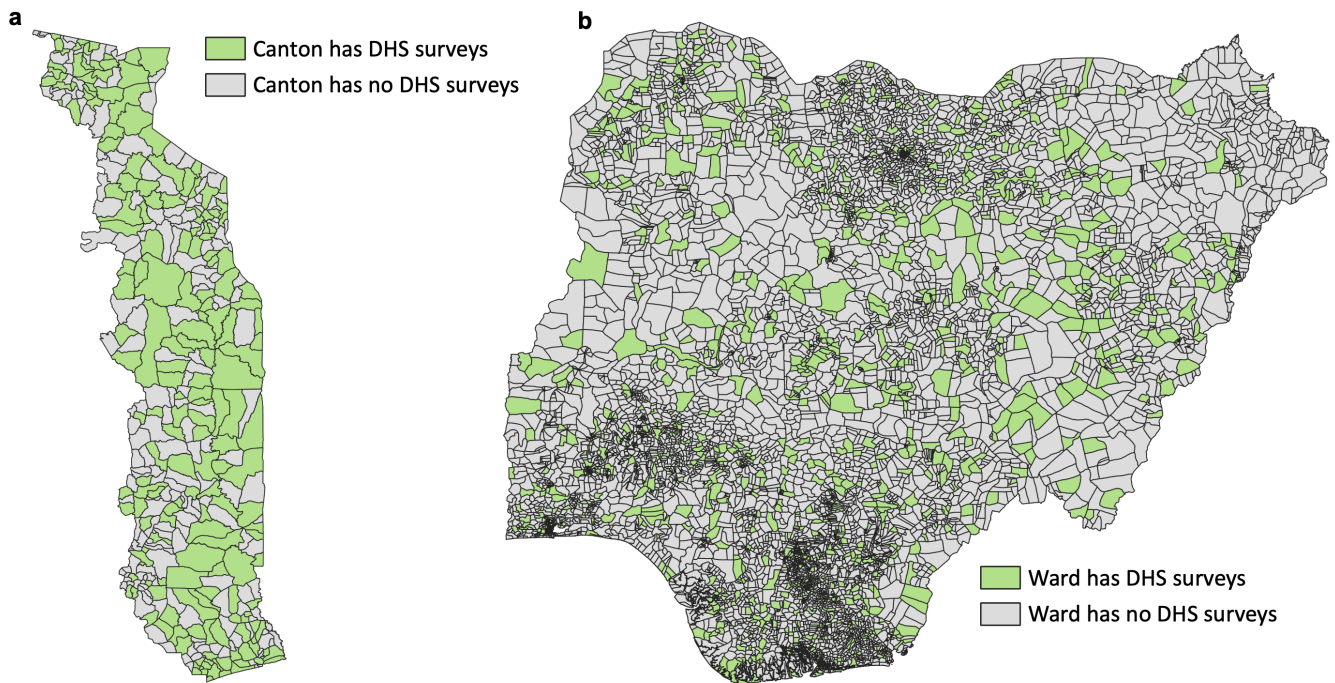

**Fig. S19.** Maps of Demographic and Health Survey coverage in Togo and Nigeria. a) Map of Togo highlights, in green, the 47.8% of cantons in Togo in which at least one household was surveyed in the 2013-14 DHS survey; unsurveyed cantons shown in grey. b) Map of Nigeria shows, in green, wards with at least one surveyed household in the 2018 DHS survey (13.83% of wards); unsurveyed wards are shown in grey (86.17%).

**Table S1. Ground truth data.**

|    | Country              | Code | Survey Year | # households     | # villages    |
|----|----------------------|------|-------------|------------------|---------------|
| 1  | Albania              | AL   | 2017-18     | 15,823           | 715           |
| 2  | Angola               | AO   | 2015-16     | 16,109           | 625           |
| 3  | Armenia              | AM   | 2015-16     | 7,893            | 313           |
| 4  | Bangladesh           | BD   | 2014        | 17,270           | 599           |
| 5  | Benin                | BJ   | 2017-18     | 13,776           | 540           |
| 6  | Bolivia              | BO   | 2008        | 19,526           | 998           |
| 7  | Burkina Faso         | BF   | 2010        | 13,617           | 541           |
| 8  | Burundi              | BI   | 2016-17     | 15,921           | 552           |
| 9  | Cambodia             | KH   | 2014        | 15,825           | 611           |
| 10 | Cameroon             | CM   | 2011        | 14,189           | 577           |
| 11 | Chad                 | TD   | 2014-15     | 17,233           | 624           |
| 12 | Colombia             | CO   | 2010        | 50,218           | 4,868         |
| 13 | Congo (DRC)          | CD   | 2013-14     | 16,680           | 492           |
| 14 | Cote d'Ivoire        | CI   | 2011-12     | 9,394            | 341           |
| 15 | Dominican Republic   | DO   | 2013        | 11,464           | 524           |
| 16 | Egypt                | EG   | 2014        | 27,904           | 1,817         |
| 17 | eSwatini / Swaziland | SZ   | 2006-07     | 4,756            | 270           |
| 18 | Ethiopia             | ET   | 2016        | 16,157           | 622           |
| 19 | Gabon                | GA   | 2012        | 9,638            | 332           |
| 20 | Ghana                | GH   | 2014        | 11,716           | 423           |
| 21 | Guatemala            | GT   | 2014-15     | 21,263           | 853           |
| 22 | Guinea               | GN   | 2018        | 7,912            | 401           |
| 23 | Guyana               | GY   | 2009        | 5,418            | 312           |
| 24 | Haiti                | HT   | 2016-17     | 13,405           | 450           |
| 25 | Honduras             | HN   | 2011-12     | 20,985           | 1,128         |
| 26 | India                | IN   | 2015-16     | 598,733          | 28,393        |
| 27 | Indonesia            | ID   | 2002-03     | 31,393           | 1,319         |
| 28 | Jordan               | JO   | 2012        | 15,190           | 806           |
| 29 | Kenya                | KE   | 2014        | 36,224           | 1,585         |
| 30 | Kyrgyz Republic      | KG   | 2012        | 7,989            | 314           |
| 31 | Lesotho              | LS   | 2014        | 9,402            | 399           |
| 32 | Liberia              | LR   | 2013        | 9,333            | 322           |
| 33 | Madagascar           | MG   | 2008-09     | 17,578           | 585           |
| 34 | Malawi               | MW   | 2015-16     | 26,361           | 850           |
| 35 | Mali                 | ML   | 2018        | 8,918            | 328           |
| 36 | Moldova              | MD   | 2005        | 11,066           | 399           |
| 37 | Morocco              | MA   | 2003-04     | 11,513           | 480           |
| 38 | Mozambique           | MZ   | 2011        | 13,899           | 609           |
| 39 | Myanmar              | MM   | 2015-16     | 12,500           | 441           |
| 40 | Namibia              | NA   | 2013        | 9,849            | 550           |
| 41 | Nepal                | NP   | 2016        | 11,040           | 383           |
| 42 | Nigeria              | NG   | 2018        | 39,540           | 1,359         |
| 43 | Pakistan             | PK   | 2017-18     | 14,517           | 560           |
| 44 | Peru                 | PE   | 2009        | 26,809           | 1,131         |
| 45 | Philippines          | PH   | 2017        | 26,673           | 1,213         |
| 46 | Rwanda               | RW   | 2014-15     | 12,699           | 492           |
| 47 | Senegal              | SN   | 2016        | 4,437            | 214           |
| 48 | Sierra Leone         | SL   | 2013        | 12,629           | 435           |
| 49 | South Africa         | ZA   | 2016        | 11,083           | 746           |
| 50 | Tajikistan           | TJ   | 2017        | 7,821            | 365           |
| 51 | Tanzania             | TZ   | 2015-16     | 12,563           | 608           |
| 52 | Timor-Leste          | TL   | 2016        | 11,502           | 455           |
| 53 | Togo                 | TG   | 2013-14     | 9,549            | 330           |
| 54 | Uganda               | UG   | 2016        | 19,284           | 685           |
| 55 | Zambia               | ZM   | 2018        | 12,595           | 535           |
| 56 | Zimbabwe             | ZW   | 2015        | 10,534           | 400           |
|    | <b>Total</b>         |      |             | <b>1,457,315</b> | <b>66,819</b> |

Notes: The relative wealth prediction model is trained on nationally representative Demographic and Health Surveys from 56 countries. See [www.dhsprogram.com](http://www.dhsprogram.com).

**Table S2. Data Sources.**

|                                        | <b>Resolution</b>              | <b>Source</b>                                                                       | <b>Min</b> | <b>Mean</b> | <b>Median</b> | <b>Max</b> |
|----------------------------------------|--------------------------------|-------------------------------------------------------------------------------------|------------|-------------|---------------|------------|
| <i>INPUT DATA</i>                      |                                |                                                                                     |            |             |               |            |
| <b>Road density*</b>                   | lat/lon                        | Open Street Map <sup>1</sup>                                                        | 0          | 0.0007      | 0             | 0.08       |
| <b>Urban or built up*</b>              | 15 arc-seconds                 | NASA (MODIS) <sup>2</sup>                                                           |            |             |               |            |
| <b>Elevation*</b>                      | 3 arc-seconds<br>(~ 90 meters) | USGS <sup>3</sup>                                                                   | -24        | 612         | 294           | 7643       |
| <b>Slope*</b>                          | 3 arc-seconds<br>(~90 meters)  | USGS <sup>3</sup>                                                                   | 0.0        | 0.024       | 0.008         | 2.108      |
| <b>Precipitation*</b>                  | 0.25-degree                    | NASA/Japan Aerospace Exploration Agency <sup>4</sup>                                | -48.7      | 1.7         | 0.0           | 2233.6     |
| <b>Population*</b>                     | 1 arc-second<br>(~30m)         | Humanitarian Data Exchange <sup>5</sup>                                             | 10         | 608         | 73            | 516163     |
| <b># Cell towers*</b>                  | 2.4km tiles                    | Facebook <sup>6</sup>                                                               | 0          | 13          | 0             | 71004      |
| <b># WiFi access points*</b>           | 2.4km tiles                    | Facebook <sup>6</sup>                                                               | 0          | 369         | 1             | 1949963    |
| <b># Mobile devices*</b>               | 2.4km tiles                    | Facebook <sup>6</sup>                                                               | 0          | 217         | 0             | 454962     |
| <b># Android devices*</b>              | 2.4km tiles                    | Facebook <sup>6</sup>                                                               | 0          | 168         | 0             | 291831     |
| <b># iOS devices*</b>                  | 2.4km tiles                    | Facebook <sup>6</sup>                                                               | 0          | 49          | 0             | 204058     |
| <b>Nightlights / Radiance (VIIRS)*</b> | 15 arc-seconds                 | National Centers for Environmental Information Earth Observation Group <sup>7</sup> | 0.0        | 1.9         | 0.3           | 58843.3    |
| <b>Satellite Imagery*</b>              | 0.58 m/pixel                   | Digital Globe <sup>8</sup> (Bing tile 15)                                           |            |             |               |            |
| <i>GROUND TRUTH DATA</i>               |                                |                                                                                     |            |             |               |            |
| <b>Household survey*</b>               | cluster                        | Demographic and Health Surveys <sup>9</sup>                                         |            |             |               |            |
| <b>Census data*</b>                    | level-2 admin                  | IPUMS <sup>10</sup>                                                                 |            |             |               |            |
| <b>Regional GDPpc</b>                  | TL3 regions                    | OECD <sup>11</sup>                                                                  |            |             |               |            |
| <b>Togo</b>                            | GPS coordinates                | Government of Togo                                                                  |            |             |               |            |
| <b>PPI data*</b>                       | GPS coordinates                | GiveDirectly <sup>12</sup>                                                          |            |             |               |            |
| <b>GDP and Gini*</b>                   | country                        | Multiple - see Table S6                                                             |            |             |               |            |

*Notes:* Summary statistics for the different datasets that are used as input to the machine learning algorithms. We use the most recently available data layer from each source. Publicly available data denoted by \*; Data requiring license or other restrictions denoted by †.

Sources:

<sup>1</sup> <http://www.openstreetmap.org>

<sup>2</sup> <http://www.landcover.org/data/lc/>

<sup>3</sup> <https://lta.cr.usgs.gov/SRTM1Arc>

<sup>4</sup> <https://disc.gsfc.nasa.gov/>

<sup>5</sup> <https://data.humdata.org/dataset/highresolutionpopulationdensitymaps>

<sup>6</sup> <https://research.fb.com/category/connectivity/>

<sup>7</sup> <https://www.ngdc.noaa.gov/eog>

<sup>8</sup> <http://www.digitalglobe.com/>

<sup>9</sup> <http://www.dhsprogram.com/>

<sup>10</sup> <https://international.ipums.org/international/>

<sup>11</sup> [https://stats.oecd.org/Index.aspx?DataSetCode=PDB\\_LV](https://stats.oecd.org/Index.aspx?DataSetCode=PDB_LV)

<sup>12</sup> <http://www.givedirectly.org/>

**Table S3. Census validation data.**

|    | <b>Country</b>     | <b>Survey Year</b> | <b># Households</b> | <b># Individuals</b> | <b># Admin units</b> | <b>R<sup>2</sup></b> |
|----|--------------------|--------------------|---------------------|----------------------|----------------------|----------------------|
| 1  | Benin              | 2013               | 180,621             | 1,009,693            | 77                   | 0.90                 |
| 2  | Dominican Republic | 2010               | 268,637             | 943,784              | 67                   | 0.90                 |
| 3  | Haiti              | 2003               | 179,190             | 838,045              | 28                   | 0.96                 |
| 4  | Honduras           | 2001               | 123,584             | 608,620              | 99                   | 0.93                 |
| 5  | Lesotho            | 2006               | 41,726              | 180,208              | 64                   | 0.77                 |
| 6  | Mexico             | 2015               | 2,927,196           | 11,344,365           | 32                   | 0.80                 |
| 7  | Nicaragua          | 2005               | 105,629             | 515,485              | 70                   | 0.94                 |
| 8  | Panama             | 2010               | 95,579              | 341,118              | 36                   | 0.90                 |
| 9  | Rwanda             | 2012               | 242,461             | 1,038,369            | 30                   | 0.82                 |
| 10 | Senegal            | 2002               | 107,999             | 994,562              | 28                   | 0.95                 |
| 11 | Sierra Leone       | 2004               | 82,518              | 494,298              | 108                  | 0.83                 |
| 12 | Tanzania           | 2012               | 950,776             | 4,498,022            | 114                  | 0.82                 |
| 13 | Togo               | 2010               | 121,237             | 584,859              | 37                   | 0.93                 |
| 14 | Venezuela          | 2001               | 543,475             | 2,306,489            | 158                  | 0.54                 |
| 15 | Zambia             | 2010               | 250,805             | 1,321,973            | 55                   | 0.94                 |
|    | <b>Total</b>       |                    | <b>6,221,433</b>    | <b>27,019,890</b>    | <b>1,003</b>         | <b>Avg: 0.86</b>     |

*Notes:* Census data from 27 million individuals in 15 countries were used to provide independent validation of the wealth estimates. Data obtained from IPUMS (1). The final column indicates the proportion of variance in wealth (as measured in the census) explained by the model's wealth estimates (RWI) – see Fig. S4.

**Table S4. Predictors of model error**

|                                                              | (1)                |       | (2)                    |       | (3)                        |       |
|--------------------------------------------------------------|--------------------|-------|------------------------|-------|----------------------------|-------|
|                                                              | Base specification |       | Incl. imagery features |       | Excluding all RWI features |       |
|                                                              | $\beta$            | SE    | $\beta$                | SE    | $\beta$                    | SE    |
| <i>Characteristics defined at the level of the grid cell</i> |                    |       |                        |       |                            |       |
| ln(Dist. to closest DHS cluster)                             | 0.0217**           | 0.01  | 0.0153                 | 0.01  | 0.0206**                   | 0.01  |
| ln(# DHS clusters w/in 50 km)                                | -0.0115***         | 0.003 | -0.0084***             | 0.003 | -0.0158***                 | 0.003 |
| ln(# DHS clusters w/in 250 km)                               | -0.0131***         | 0.002 | -0.0144***             | 0.002 | -0.0106***                 | 0.002 |
| ln(# DHS clusters w/in 500 km)                               | -0.0004            | 0.001 | 0.0025                 | 0.002 | -0.0013                    | 0.001 |
| ln(# DHS clusters w/in 1000 km)                              | 0.0225***          | 0.002 | 0.0231***              | 0.002 | 0.023***                   | 0.002 |
| ln(Slope)                                                    | -0.1535**          | 0.07  | -0.2316***             | 0.082 |                            |       |
| ln(Elevation)                                                | 0.0144***          | 0.001 | 0.0087***              | 0.002 |                            |       |
| ln(Precipitation)                                            | 0.0166***          | 0.004 | 0.0147***              | 0.004 |                            |       |
| Is urban or built up                                         | -0.0751***         | 0.006 | -0.0685***             | 0.007 |                            |       |
| Road density                                                 | -0.7382*           | 0.382 | 0.8917*                | 0.497 |                            |       |
| ln(Radiance)                                                 | -0.0033            | 0.004 | -0.0195***             | 0.004 |                            |       |
| ln(Tile population)                                          | 0.012***           | 0.002 | 0.0112***              | 0.002 |                            |       |
| ln(# cell towers)                                            | 0.0022             | 0.004 | -0.0015                | 0.004 |                            |       |
| ln(# Wifi access points)                                     | 0.0227***          | 0.003 | 0.0208***              | 0.003 |                            |       |
| ln(# mobile devices)                                         | 0.1581***          | 0.02  | 0.1696***              | 0.021 |                            |       |
| ln(# Android devices)                                        | -0.1423***         | 0.02  | -0.1493***             | 0.02  |                            |       |
| ln(# iOS devices)                                            | -0.0304***         | 0.003 | -0.0308***             | 0.003 |                            |       |
| <i>Characteristics defined at the level of the country</i>   |                    |       |                        |       |                            |       |
| ln(# neighbor countries w/ DHS data)                         | 0.0124**           | 0.005 | 0.0236***              | 0.006 | 0                          | 0.005 |
| ln(Dist. to next-closest DHS country)                        | 0.0846***          | 0.007 | 0.0922***              | 0.008 | 0.0761***                  | 0.007 |
| Is country an island                                         | 0.0209**           | 0.01  | 0.0449***              | 0.011 | -0.0038                    | 0.01  |
| Is country landlocked                                        | -0.0153**          | 0.006 | -0.0638***             | 0.007 | -0.0155***                 | 0.006 |
| Is America                                                   | -0.1066***         | 0.01  | -0.1101***             | 0.012 | -0.0934***                 | 0.009 |
| Is Asia                                                      | 0.071***           | 0.007 | -0.0025                | 0.009 | 0.0825***                  | 0.007 |
| Is Europe                                                    | -0.041***          | 0.015 | -0.129***              | 0.018 | -0.0664***                 | 0.014 |
| ln(Country Area)                                             | -0.0349***         | 0.004 | -0.0407***             | 0.004 | -0.034***                  | 0.003 |
| ln(Country population)                                       | 0.0044*            | 0.003 | 0.0187***              | 0.003 | 0.011***                   | 0.003 |
| ln(Country GDP per capita)                                   | -0.0151***         | 0.004 | -0.0313***             | 0.005 | 0.0039                     | 0.004 |
| Gini                                                         | 0.5347***          | 0.04  | 0.1347***              | 0.047 | 0.578***                   | 0.039 |
| Satellite image features?                                    | No                 |       | Yes                    |       | No                         |       |
| Constant                                                     | -0.225***          | 0.059 | -0.0905                | 0.069 | -0.1614***                 | 0.058 |
| $R^2$                                                        | 0.061              |       | 0.117                  |       | 0.029                      |       |

*Notes:* Table shows coefficients and standard errors from a linear regression of absolute model error (defined as the absolute value of the residual from the wealth prediction model, estimated on DHS clusters with ground truth labels) on observable characteristics of the DHS centroid's location. Each column corresponds to a different set of regressors. Data sources for country-level characteristics are provided in Table S6. Distance to next closest DHS country measures the distance between the centroids of countries (as defined by [https://developers.google.com/public-data/docs/canonical/countries\\_csv](https://developers.google.com/public-data/docs/canonical/countries_csv)); # DHS Neighbor Countries counts the number of DHS countries that share a border with the country in which the cluster is located. We add one to values before taking the natural log to avoid undefined values. \*significant at 10 percent; \*\* significant at 5 percent; \*\*\* significant at 1 percent.



**Table S5. Estimates of model error in all low and middle-income countries.**

|    | Country                  | Estimated error |       |        | Mean squared error |       |        |       |
|----|--------------------------|-----------------|-------|--------|--------------------|-------|--------|-------|
|    |                          | Code            | Mean  | Median | S.D.               | Mean  | Median | S.D.  |
| 1  | Afghanistan              | AF              | 0.217 | 0.213  | 0.024              |       |        |       |
| 2  | Albania                  | AL              | 0.440 | 0.435  | 0.061              | 0.551 | 0.203  | 1.257 |
| 3  | Algeria                  | DZ              | 0.325 | 0.308  | 0.060              |       |        |       |
| 4  | American Samoa           | AS              | 0.647 | 0.673  | 0.057              |       |        |       |
| 5  | Angola                   | AO              | 0.373 | 0.368  | 0.029              | 0.390 | 0.227  | 0.524 |
| 6  | Argentina                | AR              | 0.400 | 0.394  | 0.052              |       |        |       |
| 7  | Armenia                  | AM              | 0.427 | 0.408  | 0.049              | 0.467 | 0.242  | 0.634 |
| 8  | Azerbaijan               | AZ              | 0.260 | 0.240  | 0.053              |       |        |       |
| 9  | Bangladesh               | BD              | 0.494 | 0.503  | 0.051              | 0.414 | 0.264  | 0.467 |
| 10 | Belarus                  | BY              | 0.288 | 0.273  | 0.039              |       |        |       |
| 11 | Belize                   | BZ              | 0.378 | 0.359  | 0.049              |       |        |       |
| 12 | Benin                    | BJ              | 0.316 | 0.305  | 0.032              | 0.282 | 0.113  | 0.444 |
| 13 | Bhutan                   | BT              | 0.378 | 0.365  | 0.040              |       |        |       |
| 14 | Bolivia                  | BO              | 0.396 | 0.387  | 0.035              | 0.472 | 0.256  | 0.610 |
| 15 | Bosnia & Herzegovina     | BA              | 0.360 | 0.351  | 0.046              |       |        |       |
| 16 | Botswana                 | BW              | 0.393 | 0.377  | 0.036              |       |        |       |
| 17 | Brazil                   | BR              | 0.395 | 0.392  | 0.047              |       |        |       |
| 18 | Bulgaria                 | BG              | 0.409 | 0.407  | 0.046              |       |        |       |
| 19 | Burkina Faso             | BF              | 0.301 | 0.294  | 0.026              | 0.258 | 0.062  | 0.718 |
| 20 | Burundi                  | BI              | 0.269 | 0.259  | 0.030              | 0.429 | 0.169  | 0.805 |
| 21 | Cabo Verde               | CV              | 0.532 | 0.528  | 0.062              |       |        |       |
| 22 | Cambodia                 | KH              | 0.503 | 0.497  | 0.061              | 0.387 | 0.191  | 0.559 |
| 23 | Cameroon                 | CM              | 0.364 | 0.355  | 0.033              | 0.372 | 0.202  | 0.445 |
| 24 | Central African Republic | CF              | 0.382 | 0.380  | 0.013              |       |        |       |
| 25 | Chad                     | TD              | 0.346 | 0.348  | 0.023              | 0.335 | 0.067  | 0.797 |
| 26 | China                    | CN              | 0.372 | 0.349  | 0.064              |       |        |       |
| 27 | Colombia                 | CO              | 0.476 | 0.465  | 0.054              | 0.659 | 0.209  | 1.152 |
| 28 | Comoros                  | KM              | 0.537 | 0.510  | 0.055              |       |        |       |
| 29 | Congo                    | CG              | 0.335 | 0.333  | 0.013              |       |        |       |
| 30 | Congo, Dem. Rep.         | CD              | 0.378 | 0.375  | 0.019              | 0.307 | 0.082  | 0.612 |
| 31 | Costa Rica               | CR              | 0.530 | 0.537  | 0.055              |       |        |       |
| 32 | Cote d'Ivoire            | CI              | 0.361 | 0.348  | 0.040              | 0.404 | 0.210  | 0.593 |
| 33 | Cuba                     | CU              | 0.412 | 0.398  | 0.045              |       |        |       |
| 34 | Djibouti                 | DJ              | 0.341 | 0.336  | 0.024              |       |        |       |
| 35 | Dominica                 | DM              | 0.573 | 0.592  | 0.057              |       |        |       |
| 36 | Dominican Republic       | DO              | 0.430 | 0.434  | 0.049              | 0.709 | 0.378  | 0.890 |
| 37 | Ecuador                  | EC              | 0.443 | 0.429  | 0.051              |       |        |       |
| 38 | Egypt                    | EG              | 0.455 | 0.476  | 0.077              | 0.466 | 0.252  | 0.585 |
| 39 | El Salvador              | SV              | 0.417 | 0.420  | 0.038              |       |        |       |
| 40 | Equatorial Guinea        | GQ              | 0.335 | 0.325  | 0.031              |       |        |       |
| 41 | Eritrea                  | ER              | 0.279 | 0.276  | 0.012              |       |        |       |
| 42 | Eswatini                 | SZ              | 0.469 | 0.454  | 0.044              | 0.466 | 0.309  | 0.521 |
| 43 | Ethiopia                 | ET              | 0.359 | 0.360  | 0.029              | 0.236 | 0.075  | 0.427 |
| 44 | Fiji                     | FJ              | 0.502 | 0.481  | 0.050              |       |        |       |
| 45 | Gabon                    | GA              | 0.390 | 0.387  | 0.021              | 0.347 | 0.182  | 0.418 |
| 46 | Gambia                   | GM              | 0.291 | 0.271  | 0.045              |       |        |       |
| 47 | Georgia                  | GE              | 0.334 | 0.315  | 0.048              |       |        |       |
| 48 | Ghana                    | GH              | 0.348 | 0.330  | 0.047              | 0.363 | 0.180  | 0.567 |
| 49 | Grenada                  | GD              | 0.583 | 0.591  | 0.046              |       |        |       |
| 50 | Guatemala                | GT              | 0.460 | 0.456  | 0.054              | 0.553 | 0.311  | 0.704 |
| 51 | Guinea                   | GN              | 0.250 | 0.241  | 0.029              | 0.258 | 0.117  | 0.459 |
| 52 | Guinea-Bissau            | GW              | 0.352 | 0.346  | 0.020              |       |        |       |
| 53 | Guyana                   | GY              | 0.412 | 0.399  | 0.039              | 0.388 | 0.192  | 0.548 |
| 54 | Haiti                    | HT              | 0.338 | 0.326  | 0.043              | 0.318 | 0.127  | 0.492 |
| 55 | Honduras                 | HN              | 0.437 | 0.420  | 0.049              | 0.401 | 0.226  | 0.529 |
| 56 | India                    | IN              | 0.465 | 0.466  | 0.053              | 0.506 | 0.264  | 0.651 |
| 57 | Indonesia                | ID              | 0.438 | 0.431  | 0.068              | 0.580 | 0.300  | 0.767 |
| 58 | Iran, Islamic Rep.       | IR              | 0.368 | 0.363  | 0.042              |       |        |       |

|     |                                |    |       |       |       |       |       |       |
|-----|--------------------------------|----|-------|-------|-------|-------|-------|-------|
| 59  | Iraq                           | IQ | 0.374 | 0.347 | 0.064 |       |       |       |
| 60  | Jamaica                        | JM | 0.543 | 0.553 | 0.044 |       |       |       |
| 61  | Jordan                         | JO | 0.459 | 0.449 | 0.060 | 0.801 | 0.530 | 0.864 |
| 62  | Kazakhstan                     | KZ | 0.288 | 0.277 | 0.061 |       |       |       |
| 63  | Kenya                          | KE | 0.391 | 0.371 | 0.047 | 0.363 | 0.139 | 0.602 |
| 64  | Kiribati                       | KI | 0.523 | 0.499 | 0.049 |       |       |       |
| 65  | Korea, Dem. People's Republic  | KP | 0.607 | 0.602 | 0.012 |       |       |       |
| 66  | Kyrgyzstan                     | KG | 0.255 | 0.248 | 0.029 | 0.364 | 0.161 | 0.519 |
| 67  | Lao People's Dem. Republic     | LA | 0.376 | 0.359 | 0.048 |       |       |       |
| 68  | Lebanon                        | LB | 0.470 | 0.480 | 0.042 |       |       |       |
| 69  | Lesotho                        | LS | 0.448 | 0.439 | 0.035 | 0.300 | 0.171 | 0.414 |
| 70  | Liberia                        | LR | 0.284 | 0.275 | 0.030 | 0.239 | 0.097 | 0.402 |
| 71  | Libya                          | LY | 0.281 | 0.259 | 0.050 |       |       |       |
| 72  | Madagascar                     | MG | 0.359 | 0.360 | 0.026 | 0.288 | 0.100 | 0.593 |
| 73  | Malawi                         | MW | 0.378 | 0.366 | 0.034 | 0.401 | 0.132 | 0.756 |
| 74  | Malaysia                       | MY | 0.505 | 0.513 | 0.047 |       |       |       |
| 75  | Maldives                       | MV | 0.671 | 0.669 | 0.059 |       |       |       |
| 76  | Mali                           | ML | 0.274 | 0.269 | 0.025 | 0.206 | 0.065 | 0.387 |
| 77  | Marshall Islands               | MH | 0.566 | 0.552 | 0.040 |       |       |       |
| 78  | Mauritania                     | MR | 0.270 | 0.264 | 0.025 |       |       |       |
| 79  | Mauritius                      | MU | 0.582 | 0.586 | 0.037 |       |       |       |
| 80  | Mexico                         | MX | 0.447 | 0.445 | 0.065 |       |       |       |
| 81  | Micronesia, Fed. Sts.          | FM | 0.537 | 0.510 | 0.047 |       |       |       |
| 82  | Moldova                        | MD | 0.403 | 0.396 | 0.049 | 0.565 | 0.268 | 0.735 |
| 83  | Mongolia                       | MN | 0.290 | 0.268 | 0.049 |       |       |       |
| 84  | Montenegro                     | ME | 0.288 | 0.270 | 0.049 |       |       |       |
| 85  | Morocco                        | MA | 0.437 | 0.420 | 0.050 | 0.640 | 0.298 | 0.792 |
| 86  | Mozambique                     | MZ | 0.372 | 0.366 | 0.027 | 0.300 | 0.138 | 0.510 |
| 87  | Myanmar                        | MM | 0.405 | 0.389 | 0.058 | 0.374 | 0.180 | 0.532 |
| 88  | Namibia                        | NA | 0.466 | 0.452 | 0.038 | 0.526 | 0.267 | 0.699 |
| 89  | Nauru                          | NR | 0.686 | 0.690 | 0.045 |       |       |       |
| 90  | Nepal                          | NP | 0.425 | 0.414 | 0.052 | 0.378 | 0.217 | 0.473 |
| 91  | Nicaragua                      | NI | 0.342 | 0.326 | 0.044 |       |       |       |
| 92  | Niger                          | NE | 0.275 | 0.270 | 0.020 |       |       |       |
| 93  | Nigeria                        | NG | 0.385 | 0.373 | 0.044 | 0.406 | 0.189 | 0.597 |
| 94  | North Macedonia                | MK | 0.273 | 0.259 | 0.047 |       |       |       |
| 95  | Pakistan                       | PK | 0.430 | 0.420 | 0.052 | 0.550 | 0.270 | 0.753 |
| 96  | Papua New Guinea               | PG | 0.339 | 0.333 | 0.024 |       |       |       |
| 97  | Paraguay                       | PY | 0.416 | 0.403 | 0.044 |       |       |       |
| 98  | Peru                           | PE | 0.438 | 0.423 | 0.047 | 0.430 | 0.212 | 0.573 |
| 99  | Philippines                    | PH | 0.514 | 0.516 | 0.057 | 0.487 | 0.232 | 0.645 |
| 100 | Romania                        | RO | 0.364 | 0.369 | 0.043 |       |       |       |
| 101 | Russian Federation             | RU | 0.346 | 0.318 | 0.050 |       |       |       |
| 102 | Rwanda                         | RW | 0.343 | 0.331 | 0.044 | 0.395 | 0.159 | 0.622 |
| 103 | Saint Lucia                    | LC | 0.644 | 0.652 | 0.057 |       |       |       |
| 104 | Samoa                          | WS | 0.547 | 0.523 | 0.056 |       |       |       |
| 105 | Sao Tome & Principe            | ST | 0.445 | 0.417 | 0.060 |       |       |       |
| 106 | Senegal                        | SN | 0.401 | 0.386 | 0.039 | 0.279 | 0.133 | 0.410 |
| 107 | Serbia                         | RS | 0.321 | 0.319 | 0.046 |       |       |       |
| 108 | Sierra Leone                   | SL | 0.274 | 0.265 | 0.029 | 0.211 | 0.078 | 0.626 |
| 109 | Solomon Islands                | SB | 0.399 | 0.395 | 0.020 |       |       |       |
| 110 | Somalia                        | SO | 0.301 | 0.299 | 0.018 |       |       |       |
| 111 | South Africa                   | ZA | 0.514 | 0.509 | 0.055 | 0.834 | 0.292 | 1.402 |
| 112 | Sri Lanka                      | LK | 0.567 | 0.572 | 0.039 |       |       |       |
| 113 | St. Vincent and the Grenadines | VC | 0.629 | 0.646 | 0.059 |       |       |       |
| 114 | Sudan                          | SD | 0.413 | 0.405 | 0.028 |       |       |       |
| 115 | Suriname                       | SR | 0.359 | 0.341 | 0.040 |       |       |       |
| 116 | Syrian Arab Republic           | SY | 0.375 | 0.355 | 0.052 |       |       |       |
| 117 | Tajikistan                     | TJ | 0.296 | 0.289 | 0.029 | 0.509 | 0.266 | 0.596 |
| 118 | Tanzania                       | TZ | 0.331 | 0.325 | 0.032 | 0.315 | 0.162 | 0.442 |
| 119 | Thailand                       | TH | 0.441 | 0.442 | 0.031 |       |       |       |

|     |                    |    |       |       |       |       |       |       |
|-----|--------------------|----|-------|-------|-------|-------|-------|-------|
| 120 | Timor-Leste        | TL | 0.416 | 0.395 | 0.046 | 0.308 | 0.132 | 0.455 |
| 121 | Togo               | TG | 0.295 | 0.284 | 0.031 | 0.196 | 0.093 | 0.267 |
| 122 | Tonga              | TO | 0.571 | 0.533 | 0.061 |       |       |       |
| 123 | Tunisia            | TN | 0.404 | 0.396 | 0.056 |       |       |       |
| 124 | Turkey             | TR | 0.480 | 0.479 | 0.054 |       |       |       |
| 125 | Turkmenistan       | TM | 0.375 | 0.371 | 0.017 |       |       |       |
| 126 | Tuvalu             | TV | 0.595 | 0.563 | 0.052 |       |       |       |
| 127 | Uganda             | UG | 0.356 | 0.345 | 0.034 | 0.285 | 0.132 | 0.413 |
| 128 | Ukraine            | UA | 0.223 | 0.219 | 0.047 |       |       |       |
| 129 | Uzbekistan         | UZ | 0.322 | 0.310 | 0.039 |       |       |       |
| 130 | Vanuatu            | VU | 0.433 | 0.420 | 0.032 |       |       |       |
| 131 | Venezuela, RB      | VE | 0.421 | 0.410 | 0.037 |       |       |       |
| 132 | Viet Nam           | VN | 0.399 | 0.402 | 0.038 |       |       |       |
| 133 | West Bank and Gaza | PS | 0.468 | 0.470 | 0.042 |       |       |       |
| 134 | Yemen              | YE | 0.351 | 0.343 | 0.041 |       |       |       |
| 135 | Zambia             | ZM | 0.374 | 0.369 | 0.025 | 0.318 | 0.138 | 0.602 |
| 136 | Zimbabwe           | ZW | 0.365 | 0.357 | 0.031 | 0.304 | 0.109 | 0.496 |

*Notes:* Table indicates mean, median, and standard deviation of predicted model error in all LMICs (columns 3-5). In countries where ground truth DHS data exist, table reports mean, median, and standard deviation of mean squared prediction error (columns 6-8).

Table S6. Sources of country-level data.

| Country | Code                     | GDP per capita | Year (GDP) | Source (GDP per capita) | Gini                    | Year (Gini) | Source (Gini)                |
|---------|--------------------------|----------------|------------|-------------------------|-------------------------|-------------|------------------------------|
| 1       | Afghanistan              | AF             | 520.90     | 2018                    | World Bank <sup>1</sup> | 0.278       | - <sup>6</sup>               |
| 2       | Albania                  | AL             | 5253.63    | 2018                    | World Bank <sup>1</sup> | 0.29        | 2012 World Bank <sup>2</sup> |
| 3       | Algeria                  | DZ             | 4278.85    | 2018                    | World Bank <sup>1</sup> | 0.276       | 2011 World Bank <sup>2</sup> |
| 4       | American Samoa           | AS             | 11398.78   | 2017                    | World Bank <sup>1</sup> | 0.387       | - WS <sup>4</sup>            |
| 5       | Angola                   | AO             | 3432.39    | 2018                    | World Bank <sup>1</sup> | 0.427       | 2008 World Bank <sup>2</sup> |
| 6       | Argentina                | AR             | 11652.57   | 2018                    | World Bank <sup>1</sup> | 0.406       | 2017 World Bank <sup>2</sup> |
| 7       | Armenia                  | AM             | 4212.07    | 2018                    | World Bank <sup>1</sup> | 0.336       | 2017 World Bank <sup>2</sup> |
| 8       | Azerbaijan               | AZ             | 4721.18    | 2018                    | World Bank <sup>1</sup> | 0.266       | 2005 World Bank <sup>2</sup> |
| 9       | Bangladesh               | BD             | 1698.26    | 2018                    | World Bank <sup>1</sup> | 0.324       | 2016 World Bank <sup>2</sup> |
| 10      | Belarus                  | BY             | 6289.94    | 2018                    | World Bank <sup>1</sup> | 0.254       | 2017 World Bank <sup>2</sup> |
| 11      | Belize                   | BZ             | 5025.18    | 2018                    | World Bank <sup>1</sup> | 0.533       | 1999 World Bank <sup>2</sup> |
| 12      | Benin                    | BJ             | 901.95     | 2018                    | World Bank <sup>1</sup> | 0.478       | 2015 World Bank <sup>2</sup> |
| 13      | Bhutan                   | BT             | 3360.27    | 2018                    | World Bank <sup>1</sup> | 0.374       | 2017 World Bank <sup>2</sup> |
| 14      | Bolivia                  | BO             | 3548.59    | 2018                    | World Bank <sup>1</sup> | 0.44        | 2017 World Bank <sup>2</sup> |
| 15      | Bosnia & Herzegovina     | BA             | 5951.32    | 2018                    | World Bank <sup>1</sup> | 0.33        | 2011 World Bank <sup>2</sup> |
| 16      | Botswana                 | BW             | 8258.64    | 2018                    | World Bank <sup>1</sup> | 0.533       | 2015 World Bank <sup>2</sup> |
| 17      | Brazil                   | BR             | 8920.76    | 2018                    | World Bank <sup>1</sup> | 0.533       | 2017 World Bank <sup>2</sup> |
| 18      | Bulgaria                 | BG             | 9272.63    | 2018                    | World Bank <sup>1</sup> | 0.374       | 2014 World Bank <sup>2</sup> |
| 19      | Burkina Faso             | BF             | 731.17     | 2018                    | World Bank <sup>1</sup> | 0.353       | 2014 World Bank <sup>2</sup> |
| 20      | Burundi                  | BI             | 275.43     | 2018                    | World Bank <sup>1</sup> | 0.386       | 2013 World Bank <sup>2</sup> |
| 21      | Cabo Verde               | CV             | 3654.01    | 2018                    | World Bank <sup>1</sup> | 0.472       | 2007 World Bank <sup>2</sup> |
| 22      | Cambodia                 | KH             | 1512.13    | 2018                    | World Bank <sup>1</sup> | 0.379       | - <sup>5</sup>               |
| 23      | Cameroon                 | CM             | 1526.88    | 2018                    | World Bank <sup>1</sup> | 0.466       | 2014 World Bank <sup>2</sup> |
| 24      | Central African Republic | CF             | 509.97     | 2018                    | World Bank <sup>1</sup> | 0.562       | 2008 World Bank <sup>2</sup> |
| 25      | Chad                     | TD             | 730.24     | 2018                    | World Bank <sup>1</sup> | 0.433       | 2011 World Bank <sup>2</sup> |
| 26      | China                    | CN             | 9770.85    | 2018                    | World Bank <sup>1</sup> | 0.386       | 2015 World Bank <sup>2</sup> |
| 27      | Colombia                 | CO             | 6651.29    | 2018                    | World Bank <sup>1</sup> | 0.497       | 2017 World Bank <sup>2</sup> |
| 28      | Comoros                  | KM             | 1445.45    | 2018                    | World Bank <sup>1</sup> | 0.453       | 2013 World Bank <sup>2</sup> |
| 29      | Congo, Dem. Rep.         | CD             | 561.78     | 2018                    | World Bank <sup>1</sup> | 0.421       | 2012 World Bank <sup>2</sup> |
| 30      | Congo, Rep.              | CG             | 2147.77    | 2018                    | World Bank <sup>1</sup> | 0.489       | 2011 World Bank <sup>2</sup> |
| 31      | Costa Rica               | CR             | 12026.55   | 2018                    | World Bank <sup>1</sup> | 0.483       | 2017 World Bank <sup>2</sup> |
| 32      | Cote d'Ivoire            | CI             | 1715.53    | 2018                    | World Bank <sup>1</sup> | 0.415       | 2015 World Bank <sup>2</sup> |
| 33      | Cuba                     | CU             | 8541.21    | 2017                    | World Bank <sup>1</sup> | 0.38        | 2003 <sup>7</sup>            |
| 34      | Djibouti                 | DJ             | 2050.20    | 2018                    | World Bank <sup>1</sup> | 0.416       | 2017 World Bank <sup>2</sup> |
| 35      | Dominica                 | DM             | 7031.71    | 2018                    | World Bank <sup>1</sup> | 0.47        | 2013 <sup>8</sup>            |
| 36      | Dominican Republic       | DO             | 7650.07    | 2018                    | World Bank <sup>1</sup> | 0.457       | 2016 World Bank <sup>2</sup> |
| 37      | Ecuador                  | EC             | 6344.87    | 2018                    | World Bank <sup>1</sup> | 0.447       | 2017 World Bank <sup>2</sup> |
| 38      | Egypt, Arab Rep.         | EG             | 2549.14    | 2018                    | World Bank <sup>1</sup> | 0.318       | 2015 World Bank <sup>2</sup> |
| 39      | El Salvador              | SV             | 4058.24    | 2018                    | World Bank <sup>1</sup> | 0.38        | 2017 World Bank <sup>2</sup> |
| 40      | Equatorial Guinea        | GQ             | 10173.96   | 2018                    | World Bank <sup>1</sup> | 0.38        | - GA <sup>4</sup>            |
| 41      | Eritrea                  | ER             | 811.38     | 2011                    | World Bank <sup>1</sup> | 0.292       | 2016 <sup>9</sup>            |
| 42      | Eswatini                 | SZ             | 4139.96    | 2018                    | World Bank <sup>1</sup> | 0.515       | 2009 World Bank <sup>2</sup> |
| 43      | Ethiopia                 | ET             | 772.31     | 2018                    | World Bank <sup>1</sup> | 0.391       | 2015 World Bank <sup>2</sup> |
| 44      | Fiji                     | FJ             | 6202.16    | 2018                    | World Bank <sup>1</sup> | 0.367       | 2013 World Bank <sup>2</sup> |
| 45      | Gabon                    | GA             | 8029.82    | 2018                    | World Bank <sup>1</sup> | 0.38        | 2017 World Bank <sup>2</sup> |
| 46      | Gambia, The              | GM             | 712.45     | 2018                    | World Bank <sup>1</sup> | 0.359       | 2015 World Bank <sup>2</sup> |
| 47      | Georgia                  | GE             | 4344.63    | 2018                    | World Bank <sup>1</sup> | 0.379       | 2017 World Bank <sup>2</sup> |
| 48      | Ghana                    | GH             | 2202.31    | 2018                    | World Bank <sup>1</sup> | 0.435       | 2016 World Bank <sup>2</sup> |
| 49      | Grenada                  | GD             | 10833.66   | 2018                    | World Bank <sup>1</sup> | 0.512       | - LC <sup>4</sup>            |
| 50      | Guatemala                | GT             | 4549.01    | 2018                    | World Bank <sup>1</sup> | 0.483       | 2014 World Bank <sup>2</sup> |
| 51      | Guinea                   | GN             | 885.25     | 2018                    | World Bank <sup>1</sup> | 0.337       | 2012 World Bank <sup>2</sup> |
| 52      | Guinea-Bissau            | GW             | 777.97     | 2018                    | World Bank <sup>1</sup> | 0.507       | 2010 World Bank <sup>2</sup> |
| 53      | Guyana                   | GY             | 4634.68    | 2018                    | World Bank <sup>1</sup> | 0.446       | 1998 World Bank <sup>2</sup> |
| 54      | Haiti                    | HT             | 868.28     | 2018                    | World Bank <sup>1</sup> | 0.411       | 2012 World Bank <sup>2</sup> |
| 55      | Honduras                 | HN             | 2482.73    | 2018                    | World Bank <sup>1</sup> | 0.505       | 2017 World Bank <sup>2</sup> |
| 56      | India                    | IN             | 2015.59    | 2018                    | World Bank <sup>1</sup> | 0.357       | 2011 World Bank <sup>2</sup> |
| 57      | Indonesia                | ID             | 3893.60    | 2018                    | World Bank <sup>1</sup> | 0.381       | 2017 World Bank <sup>2</sup> |
| 58      | Iran, Islamic Rep.       | IR             | 5627.75    | 2017                    | World Bank <sup>1</sup> | 0.4         | 2016 World Bank <sup>2</sup> |

|     |                          |    |          |      |                         |       |      |                         |
|-----|--------------------------|----|----------|------|-------------------------|-------|------|-------------------------|
| 59  | Iraq                     | IQ | 5878.04  | 2018 | World Bank <sup>1</sup> | 0.295 | 2012 | World Bank <sup>2</sup> |
| 60  | Jamaica                  | JM | 5355.58  | 2018 | World Bank <sup>1</sup> | 0.455 | 2004 | World Bank <sup>2</sup> |
| 61  | Jordan                   | JO | 4247.77  | 2018 | World Bank <sup>1</sup> | 0.337 | 2010 | World Bank <sup>2</sup> |
| 62  | Kazakhstan               | KZ | 9331.05  | 2018 | World Bank <sup>1</sup> | 0.275 | 2017 | World Bank <sup>2</sup> |
| 63  | Kenya                    | KE | 1710.51  | 2018 | World Bank <sup>1</sup> | 0.408 | 2015 | World Bank <sup>2</sup> |
| 64  | Kiribati                 | KI | 1625.29  | 2018 | World Bank <sup>1</sup> | 0.37  | 2006 | World Bank <sup>2</sup> |
| 65  | Korea, D.P.R.            | KP | 1700.00  | 2015 | CIA <sup>3</sup>        | 0.85  | 2004 | <sup>12</sup>           |
| 66  | Kosovo                   | XK | 4281.29  | 2018 | World Bank <sup>1</sup> | 0.29  | 2017 | World Bank <sup>2</sup> |
| 67  | Kyrgyz Republic          | KG | 1281.36  | 2018 | World Bank <sup>1</sup> | 0.273 | 2017 | World Bank <sup>2</sup> |
| 68  | Lao PDR                  | LA | 2567.54  | 2018 | World Bank <sup>1</sup> | 0.364 | 2012 | World Bank <sup>2</sup> |
| 69  | Lebanon                  | LB | 8269.79  | 2018 | World Bank <sup>1</sup> | 0.318 | 2011 | World Bank <sup>2</sup> |
| 70  | Lesotho                  | LS | 1324.28  | 2018 | World Bank <sup>1</sup> | 0.542 | 2010 | World Bank <sup>2</sup> |
| 71  | Liberia                  | LR | 674.21   | 2018 | World Bank <sup>1</sup> | 0.353 | 2016 | World Bank <sup>2</sup> |
| 72  | Libya                    | LY | 7235.03  | 2018 | World Bank <sup>1</sup> | 0.307 | -    | <sup>10</sup>           |
| 73  | Madagascar               | MG | 460.75   | 2018 | World Bank <sup>1</sup> | 0.426 | 2012 | World Bank <sup>2</sup> |
| 74  | Malawi                   | MW | 389.40   | 2018 | World Bank <sup>1</sup> | 0.447 | 2016 | World Bank <sup>2</sup> |
| 75  | Malaysia                 | MY | 11238.96 | 2018 | World Bank <sup>1</sup> | 0.41  | 2015 | World Bank <sup>2</sup> |
| 76  | Maldives                 | MV | 10223.64 | 2018 | World Bank <sup>1</sup> | 0.384 | 2009 | World Bank <sup>2</sup> |
| 77  | Mali                     | ML | 901.40   | 2018 | World Bank <sup>1</sup> | 0.33  | 2009 | World Bank <sup>2</sup> |
| 78  | Marshall Islands         | MH | 3621.17  | 2018 | World Bank <sup>1</sup> | 0.391 | -    | TV <sup>4</sup>         |
| 79  | Mauritania               | MR | 1218.60  | 2018 | World Bank <sup>1</sup> | 0.326 | 2014 | World Bank <sup>2</sup> |
| 80  | Mauritius                | MU | 11238.69 | 2018 | World Bank <sup>1</sup> | 0.358 | 2012 | World Bank <sup>2</sup> |
| 81  | Mexico                   | MX | 9698.08  | 2018 | World Bank <sup>1</sup> | 0.434 | 2016 | World Bank <sup>2</sup> |
| 82  | Micronesia, Fed. Sts.    | FM | 3058.43  | 2018 | World Bank <sup>1</sup> | 0.401 | 2013 | World Bank <sup>2</sup> |
| 83  | Moldova                  | MD | 3189.36  | 2018 | World Bank <sup>1</sup> | 0.259 | 2017 | World Bank <sup>2</sup> |
| 84  | Mongolia                 | MN | 4103.70  | 2018 | World Bank <sup>1</sup> | 0.323 | 2016 | World Bank <sup>2</sup> |
| 85  | Montenegro               | ME | 8760.69  | 2018 | World Bank <sup>1</sup> | 0.319 | 2014 | World Bank <sup>2</sup> |
| 86  | Morocco                  | MA | 3237.88  | 2018 | World Bank <sup>1</sup> | 0.395 | 2013 | World Bank <sup>2</sup> |
| 87  | Mozambique               | MZ | 490.17   | 2018 | World Bank <sup>1</sup> | 0.54  | 2014 | World Bank <sup>2</sup> |
| 88  | Myanmar                  | MM | 1325.95  | 2018 | World Bank <sup>1</sup> | 0.381 | 2015 | World Bank <sup>2</sup> |
| 89  | Namibia                  | NA | 5931.45  | 2018 | World Bank <sup>1</sup> | 0.591 | 2015 | World Bank <sup>2</sup> |
| 90  | Nauru                    | NR | 9030.07  | 2018 | World Bank <sup>1</sup> | 0.371 | -    | SB <sup>4</sup>         |
| 91  | Nepal                    | NP | 1025.80  | 2018 | World Bank <sup>1</sup> | 0.328 | 2010 | World Bank <sup>2</sup> |
| 92  | Nicaragua                | NI | 2028.90  | 2018 | World Bank <sup>1</sup> | 0.462 | 2014 | World Bank <sup>2</sup> |
| 93  | Niger                    | NE | 411.69   | 2018 | World Bank <sup>1</sup> | 0.343 | 2014 | World Bank <sup>2</sup> |
| 94  | Nigeria                  | NG | 2028.18  | 2018 | World Bank <sup>1</sup> | 0.43  | 2009 | World Bank <sup>2</sup> |
| 95  | North Macedonia          | MK | 6083.72  | 2018 | World Bank <sup>1</sup> | 0.356 | 2015 | World Bank <sup>2</sup> |
| 96  | Pakistan                 | PK | 1472.89  | 2018 | World Bank <sup>1</sup> | 0.335 | 2015 | World Bank <sup>2</sup> |
| 97  | Papua New Guinea         | PG | 2722.60  | 2018 | World Bank <sup>1</sup> | 0.419 | 2009 | World Bank <sup>2</sup> |
| 98  | Paraguay                 | PY | 5871.47  | 2018 | World Bank <sup>1</sup> | 0.488 | 2017 | World Bank <sup>2</sup> |
| 99  | Peru                     | PE | 6947.26  | 2018 | World Bank <sup>1</sup> | 0.433 | 2017 | World Bank <sup>2</sup> |
| 100 | Philippines              | PH | 3102.71  | 2018 | World Bank <sup>1</sup> | 0.401 | 2015 | World Bank <sup>2</sup> |
| 101 | Romania                  | RO | 12301.19 | 2018 | World Bank <sup>1</sup> | 0.359 | 2015 | World Bank <sup>2</sup> |
| 102 | Russian Federation       | RU | 11288.87 | 2018 | World Bank <sup>1</sup> | 0.377 | 2015 | World Bank <sup>2</sup> |
| 103 | Rwanda                   | RW | 772.97   | 2018 | World Bank <sup>1</sup> | 0.437 | 2016 | World Bank <sup>2</sup> |
| 104 | Samoa                    | WS | 4392.47  | 2018 | World Bank <sup>1</sup> | 0.387 | 2013 | World Bank <sup>2</sup> |
| 105 | Sao Tome & Principe      | ST | 2001.14  | 2018 | World Bank <sup>1</sup> | 0.308 | 2010 | World Bank <sup>2</sup> |
| 106 | Senegal                  | SN | 1521.95  | 2018 | World Bank <sup>1</sup> | 0.403 | 2011 | World Bank <sup>2</sup> |
| 107 | Serbia                   | RS | 7234.00  | 2018 | World Bank <sup>1</sup> | 0.285 | 2015 | World Bank <sup>2</sup> |
| 108 | Sierra Leone             | SL | 522.86   | 2018 | World Bank <sup>1</sup> | 0.34  | 2011 | World Bank <sup>2</sup> |
| 109 | Solomon Islands          | SB | 2162.65  | 2018 | World Bank <sup>1</sup> | 0.371 | 2013 | World Bank <sup>2</sup> |
| 110 | Somalia                  | SO | 498.66   | 2018 | World Bank <sup>1</sup> | 0.397 | 2012 | <sup>11</sup>           |
| 111 | South Africa             | ZA | 6339.57  | 2018 | World Bank <sup>1</sup> | 0.63  | 2014 | World Bank <sup>2</sup> |
| 112 | South Sudan              | SS | 283.49   | 2016 | World Bank <sup>1</sup> | 0.463 | 2009 | World Bank <sup>2</sup> |
| 113 | Sri Lanka                | LK | 4102.48  | 2018 | World Bank <sup>1</sup> | 0.398 | 2016 | World Bank <sup>2</sup> |
| 114 | St. Lucia                | LC | 10315.03 | 2018 | World Bank <sup>1</sup> | 0.512 | 2016 | World Bank <sup>2</sup> |
| 115 | St. Vincent & Grenadines | VC | 7377.68  | 2018 | World Bank <sup>1</sup> | 0.512 | -    | LC <sup>4</sup>         |
| 116 | Sudan                    | SD | 977.27   | 2018 | World Bank <sup>1</sup> | 0.354 | 2009 | World Bank <sup>2</sup> |
| 117 | Suriname                 | SR | 5950.21  | 2018 | World Bank <sup>1</sup> | 0.576 | 1999 | World Bank <sup>2</sup> |
| 118 | Syrian Arab Republic     | SY | 2032.62  | 2007 | World Bank <sup>1</sup> | 0.358 | 2004 | World Bank <sup>2</sup> |
| 119 | Tajikistan               | TJ | 826.62   | 2018 | World Bank <sup>1</sup> | 0.34  | 2015 | World Bank <sup>2</sup> |

|     |                    |    |          |      |                         |       |      |                         |
|-----|--------------------|----|----------|------|-------------------------|-------|------|-------------------------|
| 120 | Tanzania           | TZ | 1050.68  | 2018 | World Bank <sup>1</sup> | 0.378 | 2011 | World Bank <sup>2</sup> |
| 121 | Thailand           | TH | 7273.56  | 2018 | World Bank <sup>1</sup> | 0.365 | 2017 | World Bank <sup>2</sup> |
| 122 | Timor-Leste        | TL | 2035.53  | 2018 | World Bank <sup>1</sup> | 0.287 | 2014 | World Bank <sup>2</sup> |
| 123 | Togo               | TG | 671.84   | 2018 | World Bank <sup>1</sup> | 0.431 | 2015 | World Bank <sup>2</sup> |
| 124 | Tonga              | TO | 4364.02  | 2018 | World Bank <sup>1</sup> | 0.376 | 2015 | World Bank <sup>2</sup> |
| 125 | Tunisia            | TN | 3446.61  | 2018 | World Bank <sup>1</sup> | 0.328 | 2015 | World Bank <sup>2</sup> |
| 126 | Turkey             | TR | 9311.37  | 2018 | World Bank <sup>1</sup> | 0.419 | 2016 | World Bank <sup>2</sup> |
| 127 | Turkmenistan       | TM | 6966.64  | 2018 | World Bank <sup>1</sup> | 0.408 | 1998 | World Bank <sup>2</sup> |
| 128 | Tuvalu             | TV | 3700.71  | 2018 | World Bank <sup>1</sup> | 0.391 | 2010 | World Bank <sup>2</sup> |
| 129 | Uganda             | UG | 643.14   | 2018 | World Bank <sup>1</sup> | 0.428 | 2016 | World Bank <sup>2</sup> |
| 130 | Ukraine            | UA | 3095.17  | 2018 | World Bank <sup>1</sup> | 0.25  | 2016 | World Bank <sup>2</sup> |
| 131 | Uzbekistan         | UZ | 1532.37  | 2018 | World Bank <sup>1</sup> | 0.353 | 2003 | World Bank <sup>2</sup> |
| 132 | Vanuatu            | VU | 3033.41  | 2018 | World Bank <sup>1</sup> | 0.376 | 2010 | World Bank <sup>2</sup> |
| 133 | Venezuela, RB      | VE | 16054.49 | 2014 | World Bank <sup>1</sup> | 0.469 | 2006 | World Bank <sup>2</sup> |
| 134 | Vietnam            | VN | 2563.82  | 2018 | World Bank <sup>1</sup> | 0.353 | 2016 | World Bank <sup>2</sup> |
| 135 | West Bank and Gaza | PS | 3198.87  | 2018 | World Bank <sup>1</sup> | 0.337 | 2016 | World Bank <sup>2</sup> |
| 136 | Yemen, Rep.        | YE | 944.41   | 2018 | World Bank <sup>1</sup> | 0.367 | 2014 | World Bank <sup>2</sup> |
| 137 | Zambia             | ZM | 1539.90  | 2018 | World Bank <sup>1</sup> | 0.571 | 2015 | World Bank <sup>2</sup> |
| 138 | Zimbabwe           | ZW | 2147.00  | 2018 | World Bank <sup>1</sup> | 0.432 | 2011 | World Bank <sup>2</sup> |

Notes: While most of the country-level statistics come from the World Bank's Open Data portal, when the required indicators are missing we use data from the alternative data sources listed above. Sources below.

<sup>1</sup> <https://data.worldbank.org/indicator/ny.gdp.pcap.cd>

<sup>2</sup> <https://data.worldbank.org/indicator/SI.POV.GINI?locations=US-AF>

<sup>3</sup> <https://www.cia.gov/library/publications/the-world-factbook/rankorder/2004rank.html>

<sup>4</sup> No Gini available. Gini from closest neighbor, based on orthodromic distance, is used instead (and country code is indicated in the table when applicable).

<sup>5</sup> <https://www.cia.gov/library/publications/the-world-factbook/rankorder/2172rank.html>

<sup>6</sup> <http://hdr.undp.org/en/content/income-gini-coefficient>

<sup>7</sup> <https://watermark.silverchair.com/bey026.pdf>

<sup>8</sup> [https://www.indexmundi.com/dominica/distribution\\_of\\_family\\_income\\_gini\\_index.html](https://www.indexmundi.com/dominica/distribution_of_family_income_gini_index.html)

<sup>9</sup> <https://pdfs.semanticscholar.org/1f1d/6a9df57105dba86090b5904422af6f087b9a.pdf>

<sup>10</sup> [http://www.ecineq.org/ecineq\\_nyc17/FILESx2017/CR2/p426.pdf](http://www.ecineq.org/ecineq_nyc17/FILESx2017/CR2/p426.pdf)

<sup>11</sup> <https://canada-vs-somalia.weebly.com/somalia.html>

<sup>12</sup> <https://www.pie.com/blogs/north-korea-witness-transformation/distribution-income-north-korea>

## References

1. Center, Minnesota Population, *Integrated Public Use Microdata Series, International: Version 7.2 [dataset]*. (IPUMS, Minneapolis, MN), (2019).
